# Supplementary material for: A theoretical study of an electronically mismatched Diels–Alder cycloaddition
Source: Royal Society of Chemistry journal article supplement (doi:10.1039/c7ra04480a), 2017-01-01
Supplement: c7ra04480a1.pdf [file c7ra04480a1.pdf]

## Supplementary Information

# of "A theoretical Study of an Electronically Mismatched Diels -Alder Cycloadditions"

Qian Liu<sup>a</sup>, Long-Jiu Cheng<sup>a</sup>, Kun Wang<sup>\*a,b</sup>

<sup>a</sup>Department of Chemistry, Anhui University, Hefei, Anhui 230601, P. R. China

<sup>b</sup>State Key Laboratory of Explosion Science and Technology, Beijing Institute of Technology, Beijing 100081 P. R. China

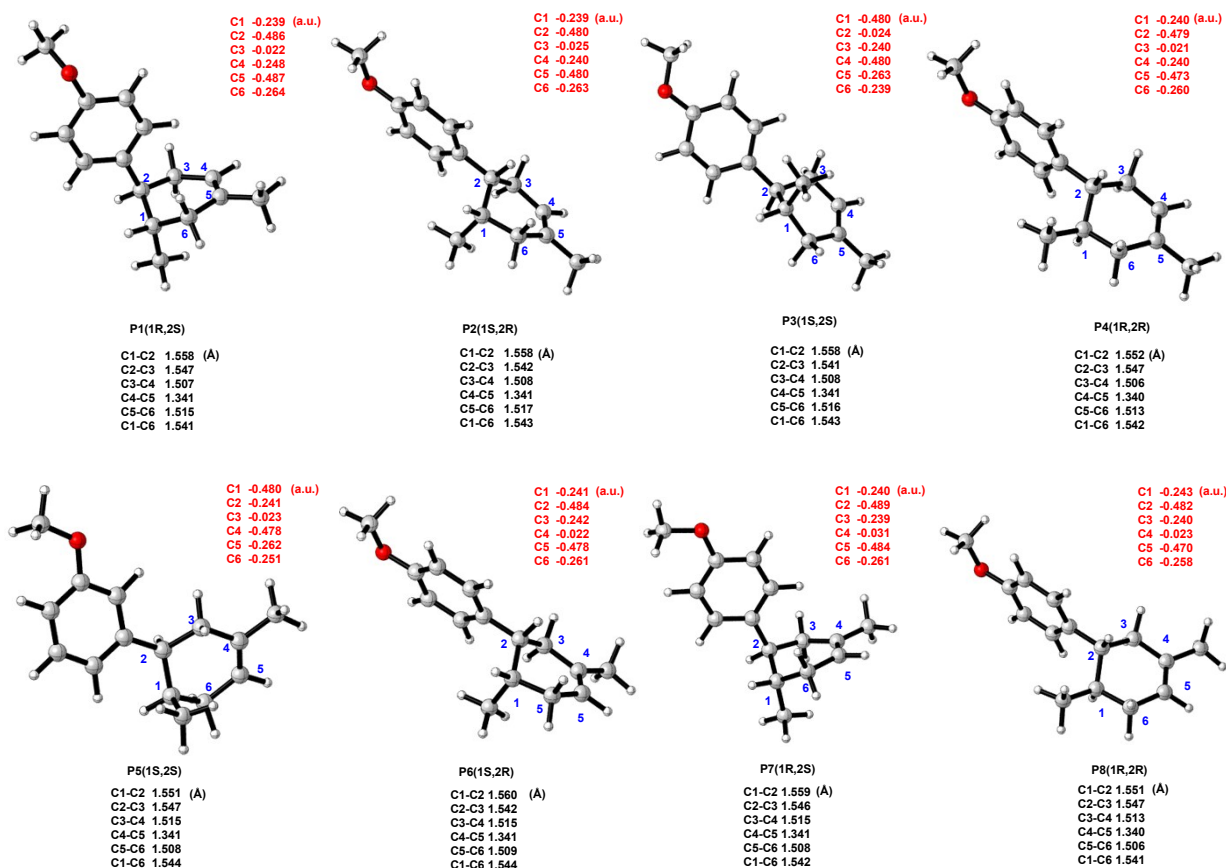

**Figure S1.** Proposed conformations of the products from the different reagents based on the optic activities of diene and the different substitution sites of -CH<sub>3</sub> on dienophile.

\*<sup>a</sup> Corresponding authors: Kun Wang, Tel & Fax: +86 551 63861279.

E-mail: [wangkun@ahu.edu.cn](mailto:wangkun@ahu.edu.cn)

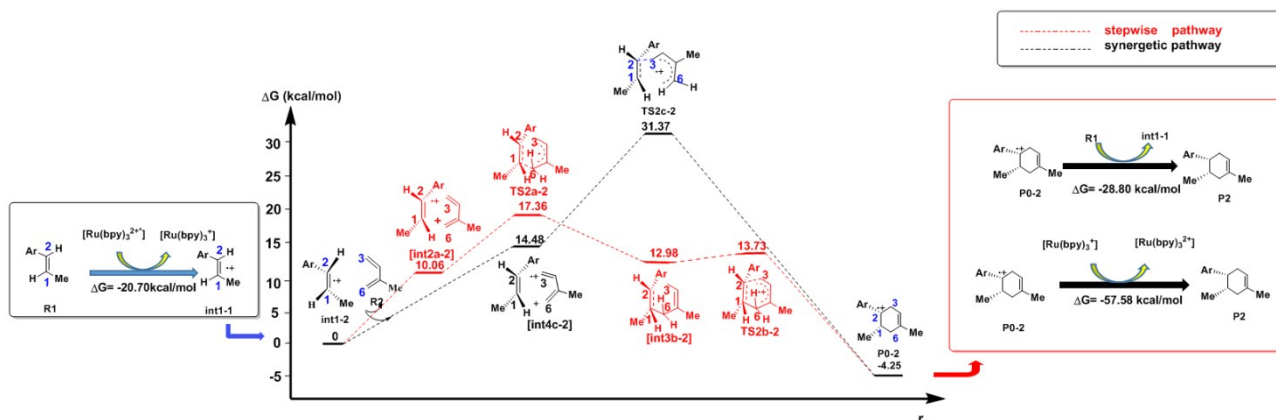

**Figure S2.** Schematic energy profiles of the C-C cycloaddition reaction between (1S,2R)-R1<sup>+</sup> and R2 (5-Me). The red line is designed as stepwise pathway and the black line is regarded as synergetic pathway. [int2a-2] and [int4c-2] are the pre-reaction compounds after the molecular orientations in the corresponding pathways which are stationary points on the potential energy surface.

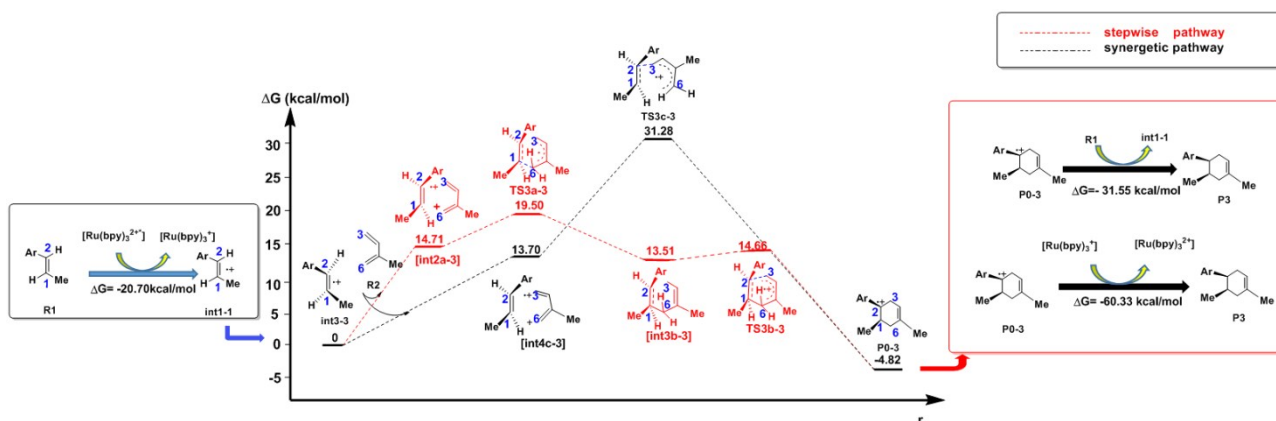

**Figure S3.** Schematic energy profiles of the C-C cycloaddition reaction between (1S,2S)-R1<sup>+</sup> and R2 (5-Me). The red line is designed as stepwise pathway and the black line is regarded as synergetic pathway. [int2a-3] and [int4c-3] are the pre-reaction compounds after the molecular orientations in the corresponding pathways which are stationary points on the potential energy surface.

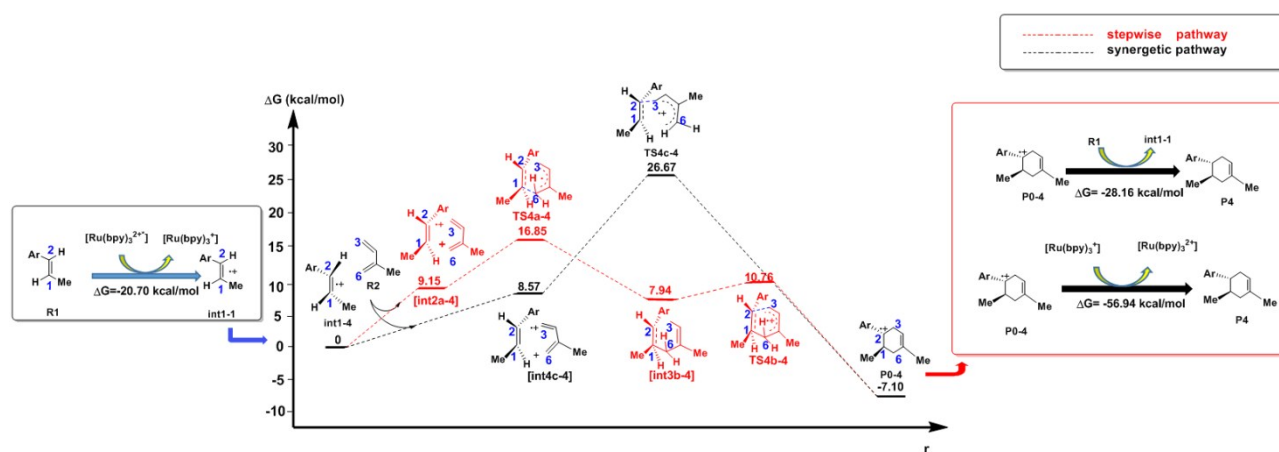

**Figure S4.** Schematic energy profiles of the C-C cycloaddition reaction between (1R,2R)-R1<sup>+</sup> and R2 (5-Me). The red line is designed as stepwise pathway and the black line is regarded as synergetic pathway. [int2a-4] and [int4c-4] are the pre-reaction compounds after the molecular orientations in the corresponding pathways which are stationary points on the potential energy surface.

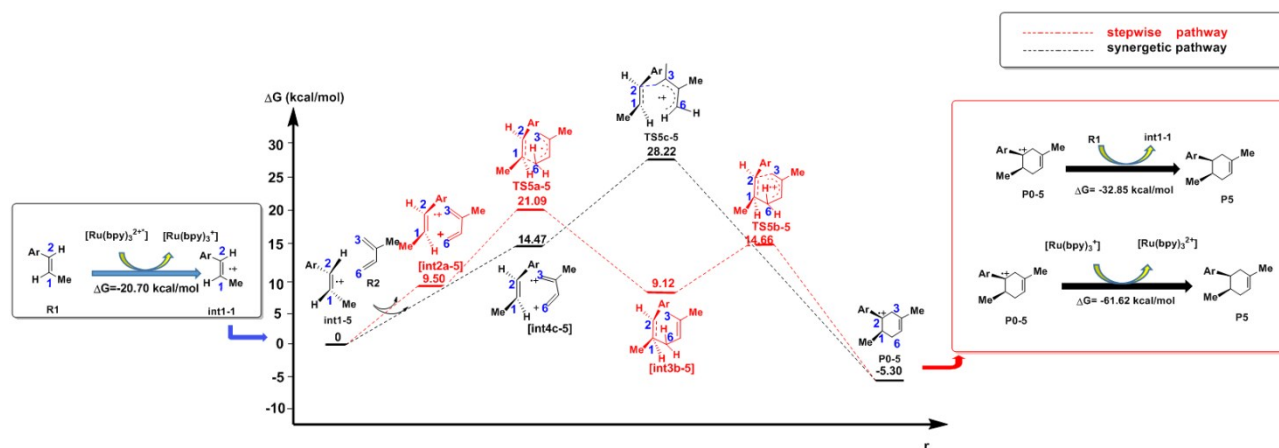

**Figure S5.** Schematic energy profiles of the C-C cycloaddition reaction between (1S,2S)-R1<sup>+</sup> and R2 (4-Me). The red line is designed as stepwise pathway and the black line is regarded as synergetic pathway. [int2a-5] and [int4c-5] are the pre-reaction compounds after the molecular orientations in the corresponding pathways which are stationary points on the potential energy surface.

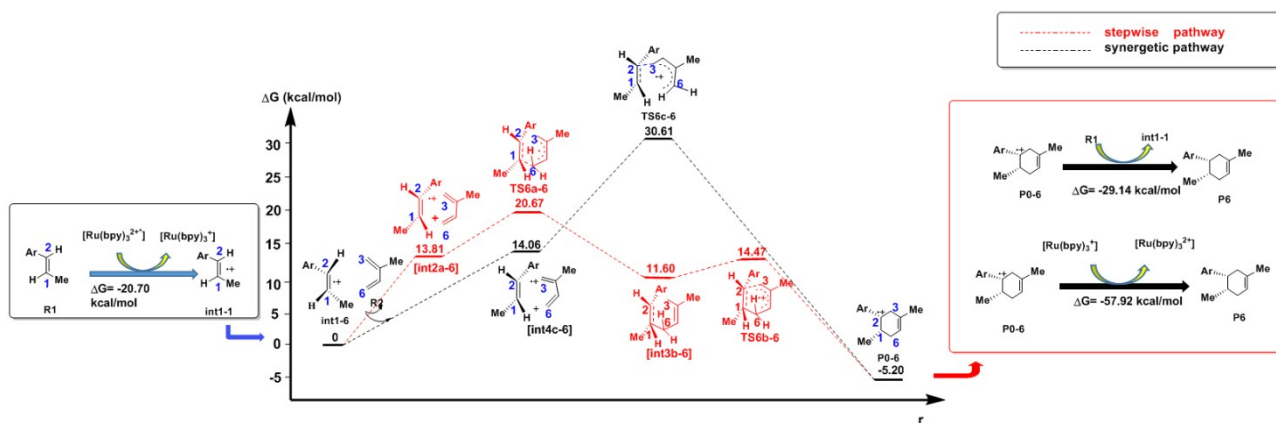

**Figure S6.** Schematic energy profiles of the C-C cycloaddition reaction between (1S,2R)- R1<sup>+</sup> and R2 (4-Me). The red line is designed as stepwise pathway and the black line is regarded as synergetic pathway. [int2a-6] and [int4c-6] are the pre-reaction compounds after the molecular orientations in the corresponding pathways which are stationary points on the potential energy surface.

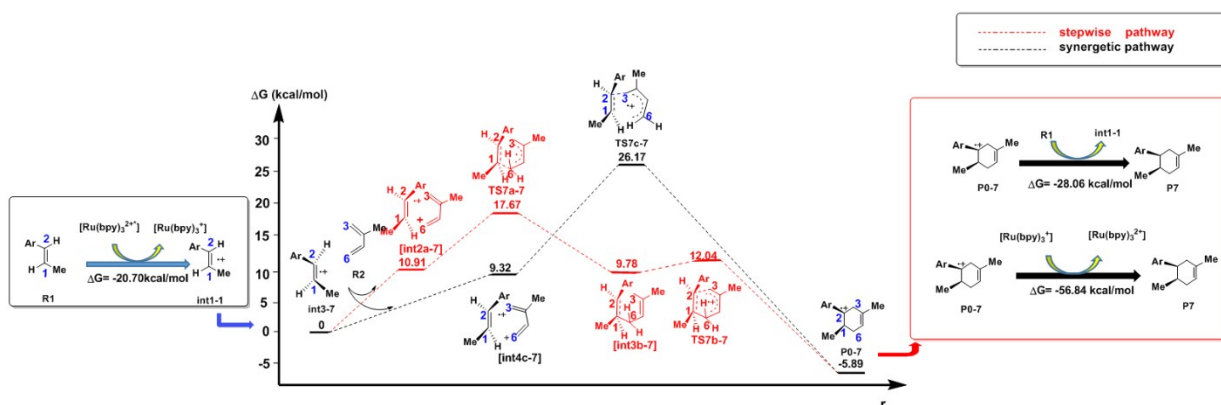

**Figure S7.** Schematic energy profiles of the C-C cycloaddition reaction between (1R,2S)- R1<sup>+</sup> and R2 (4-Me). The red line is designed as stepwise pathway and the black line is regarded as synergetic pathway. [int2a-7] and [int4c-7] are the pre-reaction compounds after the molecular orientations in the corresponding pathways which are stationary points on the potential energy surface.

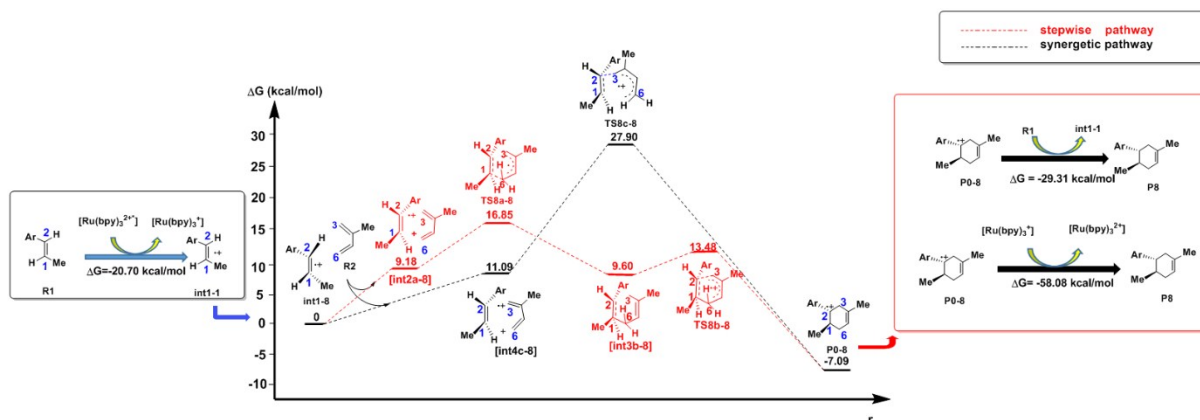

**Figure S8.** Schematic energy profiles of the C-C cycloaddition reaction between (1R,2R)-R1<sup>+</sup> and R2 (4-Me). The red line is designed as stepwise pathway and the black line is regard as synergetic pathway. **[int2a-8]** and **[int4c-8]** are the pre-reaction compounds after the molecular orientation in the corresponding pathways which are stationary points on the potential energy surface.

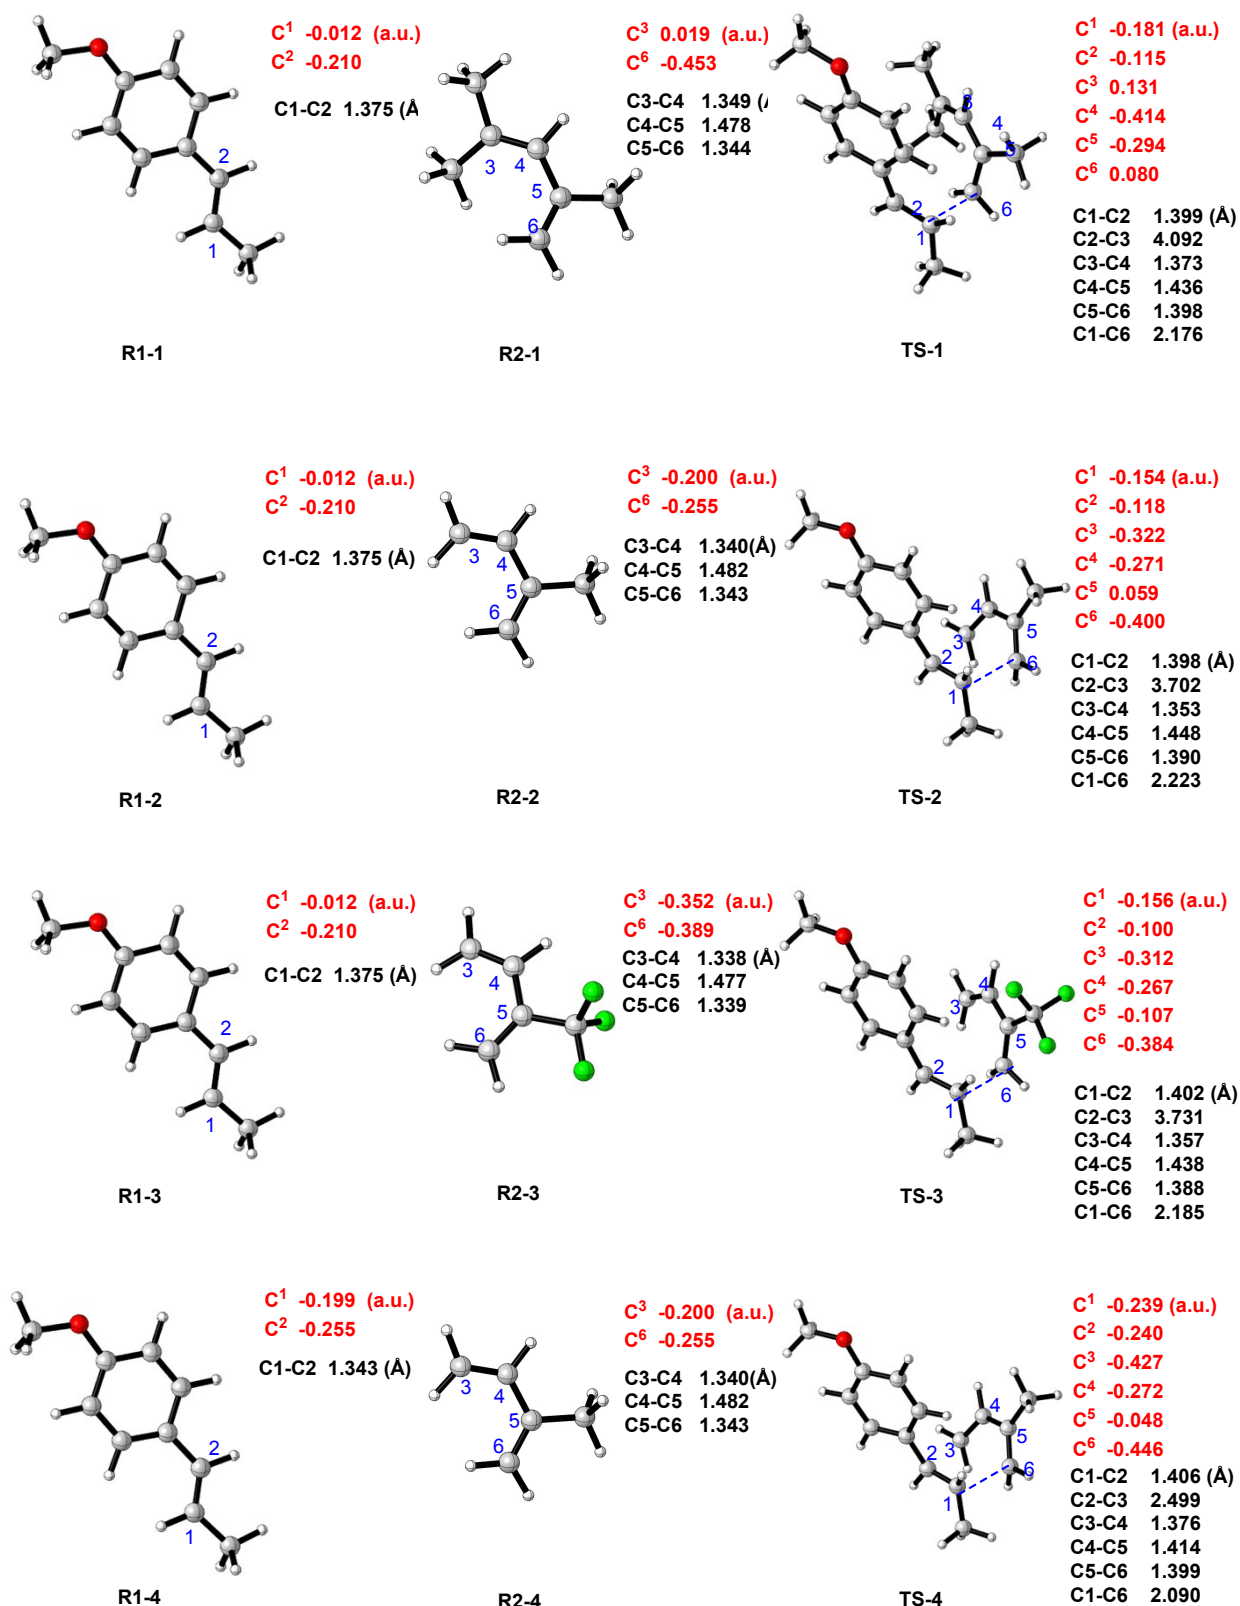

**Figure S9.** The optimized structures of the reagents and transition states including the typical bond lengths (black) and NBO atomic charges (red) with different substituents of different electronic properties.

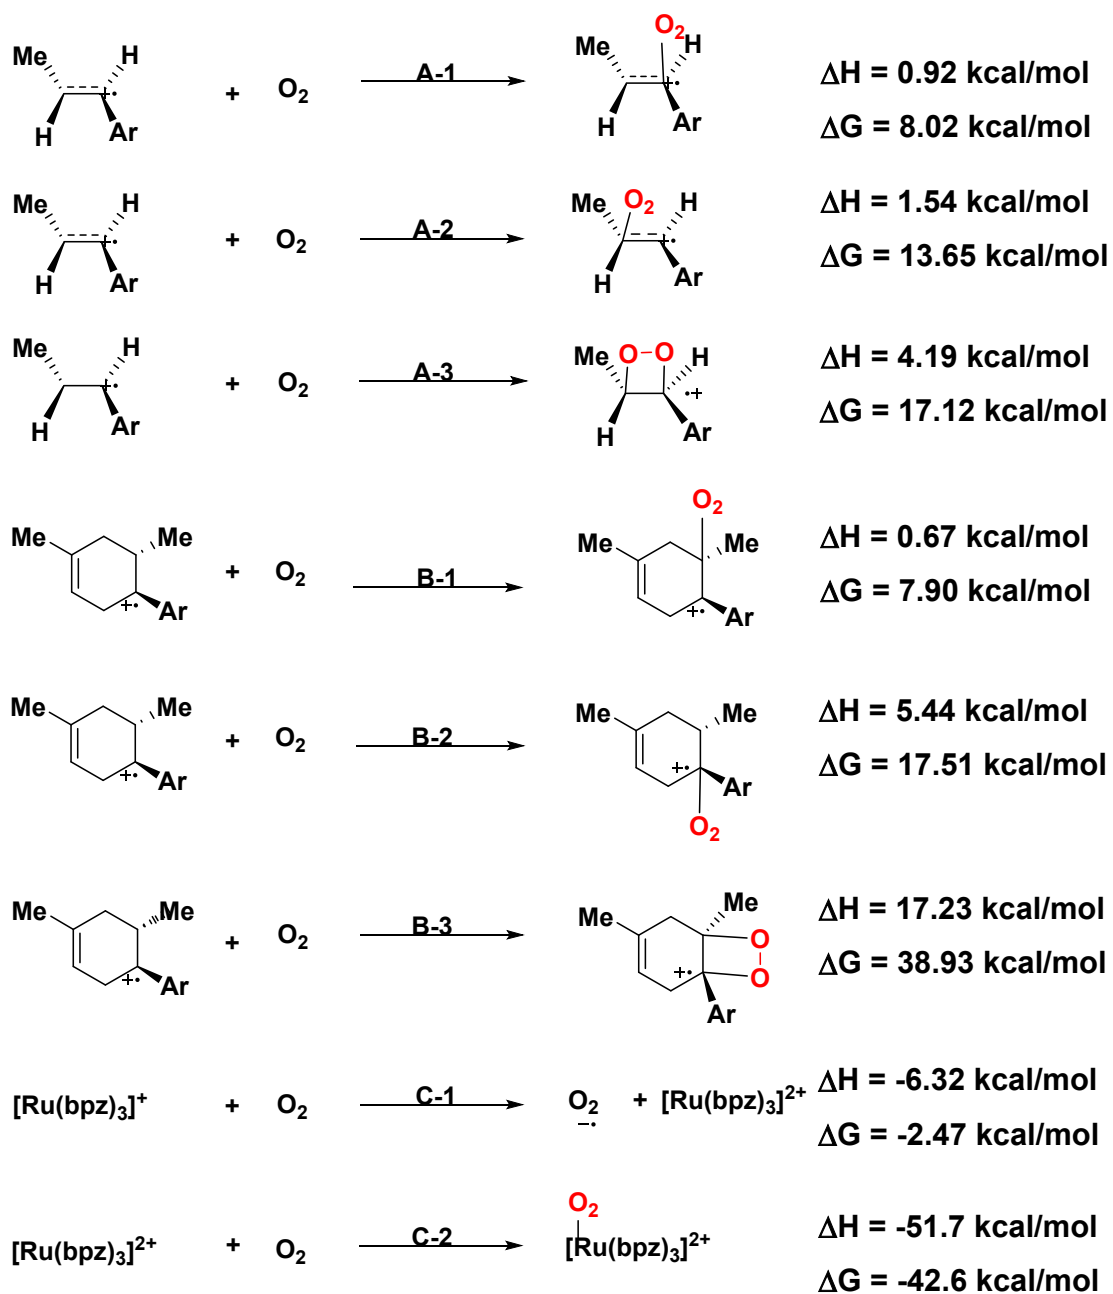

**Scheme S1** The proposed oxygen-participated reactions and the corresponding thermodynamic properties

**Cartesian coordinates of all the complexes under the theoretical level of M062X/cc-pVTZ**

| <b>Atom</b>    | <b>x</b>  | <b>y</b>  | <b>z</b>  | <b>Atom</b>     | <b>x</b>  | <b>y</b>  | <b>z</b>  |
|----------------|-----------|-----------|-----------|-----------------|-----------|-----------|-----------|
| <b>Int 1-1</b> |           |           |           | <b>Int2a-5</b>  |           |           |           |
| C              | -1.231007 | 1.487973  | -0.000062 | C               | -1.987000 | -2.356367 | 0.358632  |
| C              | 0.135861  | 1.529640  | -0.000049 | C               | -3.897729 | 0.299811  | 0.511897  |
| C              | 0.916284  | 0.329059  | -0.000095 | C               | -3.265460 | 1.095615  | -0.368796 |
| C              | 0.220205  | -0.924187 | -0.000240 | C               | -2.216574 | 2.095397  | -0.086104 |
| C              | -1.150329 | -0.981762 | -0.000286 | C               | -1.645154 | 2.249366  | 1.124025  |
| C              | -1.899548 | 0.228615  | -0.000106 | C               | -0.943768 | -1.725136 | 1.008655  |
| H              | -1.832573 | 2.390693  | 0.000013  | H               | -4.665682 | -0.393751 | 0.180895  |
| H              | 0.652011  | 2.484646  | 0.000025  | H               | -3.706857 | 0.336496  | 1.581480  |
| H              | 0.781020  | -1.851862 | 3.001193  | H               | -0.878474 | 3.001515  | 1.290382  |
| H              | -1.652215 | -1.941514 | -0.000450 | H               | -1.927681 | 1.648868  | 1.984837  |
| O              | -3.218618 | 0.292809  | 0.000053  | C               | -2.154140 | -2.685103 | -1.085990 |
| C              | -4.023571 | -0.909373 | 0.000311  | H               | -1.897265 | -1.847166 | -1.741613 |
| H              | -5.054700 | -0.558856 | 0.000798  | H               | -1.504288 | -3.528767 | -1.365092 |
| H              | -3.824907 | -1.497001 | -0.899589 | H               | -3.184539 | -2.985321 | -1.291461 |
| H              | -3.824110 | -1.497178 | 0.899919  | H               | -2.794612 | -2.679271 | 1.011975  |
| C              | 2.336084  | 0.448614  | 0.000022  | C               | 0.292740  | -1.217196 | 0.514087  |
| C              | 3.243999  | -0.584098 | 0.000051  | C               | 0.783095  | -1.373057 | -0.822658 |
| C              | 4.713595  | -0.392128 | 0.000197  | C               | 1.122672  | -0.507033 | 1.443503  |
| H              | 5.156586  | -0.889392 | 0.875815  | C               | 1.992564  | -0.847625 | -1.192049 |
| H              | 5.156687  | -0.889196 | -0.875495 | H               | 0.210183  | -1.923928 | -1.555466 |
| H              | 5.002297  | 0.662268  | 0.000315  | C               | 2.335351  | 0.029397  | 1.084670  |
| H              | 2.893153  | -1.614062 | -0.000042 | H               | 0.771212  | -0.392465 | 2.464608  |
| H              | 2.726266  | 1.464860  | 0.000133  | C               | 2.787063  | -0.132481 | -0.249757 |
| <b>Int2a-1</b> |           |           |           | H               | 2.375348  | -0.964116 | -2.200535 |
| C              | 1.940959  | 2.203332  | -0.481572 | H               | 2.933338  | 0.563676  | 1.812699  |
| C              | 3.675045  | -1.115915 | -0.072383 | H               | -1.090056 | -1.579792 | 2.076779  |
| C              | 2.599109  | -1.916683 | -0.163735 | O               | 3.933276  | 0.336037  | -0.719022 |
| C              | 1.800895  | -2.318611 | 1.015257  | C               | 4.823913  | 1.085972  | 0.136706  |
| C              | 1.638825  | -1.613850 | 2.143101  | H               | 5.670705  | 1.348582  | -0.496610 |
| C              | 0.865467  | 2.066158  | 0.364545  | H               | 4.327360  | 1.990417  | 0.498001  |
| H              | 4.242687  | -0.828349 | -0.954209 | H               | 5.157906  | 0.467153  | 0.974154  |
| H              | 4.039314  | -0.750829 | 0.884677  | H               | -3.547410 | 1.013360  | -1.418738 |
| H              | 1.904524  | 1.764698  | -1.476461 | C               | -1.798592 | 2.946022  | -1.262957 |
| H              | 1.282043  | -3.273841 | 0.921100  | H               | -1.012360 | 3.656039  | -0.989930 |
| H              | 0.940611  | 2.512248  | 1.354780  | H               | -1.426595 | 2.321298  | -2.086246 |
| C              | -0.348667 | 1.379746  | 0.074626  | H               | -2.650329 | 3.513390  | -1.661129 |
| C              | -1.343373 | 1.294943  | 1.100161  | <b>Int 3b-5</b> |           |           |           |
| C              | -0.629617 | 0.760696  | -1.187557 | C               | -2.083571 | -1.801614 | 0.329852  |
| C              | -2.532316 | 0.636209  | 0.905246  | C               | -3.270464 | -0.734993 | 0.515675  |
| H              | -1.141067 | 1.767147  | 2.056945  | C               | -3.193647 | 0.450349  | -0.377820 |
| C              | -1.810553 | 0.105089  | -1.396923 | C               | -2.709706 | 1.725284  | -0.029144 |
| H              | 0.096841  | 0.813765  | -1.990334 | C               | -2.284869 | 2.046324  | 1.245418  |



|                |           |           |           |                 |           |           |           |
|----------------|-----------|-----------|-----------|-----------------|-----------|-----------|-----------|
| C              | -2.780396 | 0.024261  | -0.353063 | C               | -0.858887 | -1.273097 | 0.968258  |
| H              | -3.266193 | 0.584912  | 1.700494  | H               | -4.177301 | -1.307122 | 0.288610  |
| H              | -2.038934 | -0.368302 | -2.345884 | H               | -3.315038 | -0.456104 | 1.571950  |
| O              | -3.879480 | -0.642997 | -0.658015 | H               | -1.902219 | 3.037080  | 1.472677  |
| C              | -4.929377 | -0.823053 | 0.320288  | H               | -2.333451 | 1.343623  | 2.070701  |
| H              | -5.694341 | -1.406186 | -0.190684 | C               | -2.039699 | -2.359541 | -1.094733 |
| H              | -4.548163 | -1.373142 | 1.184563  | H               | -1.926552 | -1.580786 | -1.853684 |
| H              | -5.334251 | 0.145818  | 0.624170  | H               | -1.229752 | -3.086506 | -1.213635 |
| C              | 3.182369  | 2.932793  | -0.129008 | H               | -2.983350 | -2.877278 | -1.298896 |
| H              | 3.344970  | 3.757393  | -0.839162 | H               | -2.397136 | -2.612314 | 1.004823  |
| H              | 3.161139  | 3.334049  | 0.887639  | C               | 0.377221  | -0.868623 | 0.478738  |
| H              | 4.052828  | 2.270464  | -0.240054 | C               | 0.771122  | -0.862487 | -0.905442 |
| C              | 2.141552  | -2.487362 | -1.486008 | C               | 1.343495  | -0.411102 | 1.441183  |
| H              | 2.158686  | -3.585588 | -1.463101 | C               | 2.015634  | -0.434789 | -1.277394 |
| H              | 1.105288  | -2.197956 | -1.706699 | H               | 0.081175  | -1.193361 | -1.667923 |
| H              | 2.776670  | -2.154585 | -2.312728 | C               | 2.595488  | 0.014352  | 1.075935  |
| H              | 1.041934  | -1.999222 | 2.965895  | H               | 1.065161  | -0.406561 | 2.491035  |
| H              | 2.091727  | -0.635028 | 2.285313  | C               | 2.947900  | 0.007198  | -0.298225 |
| <b>Int3a-1</b> |           |           |           | H               | 2.321911  | -0.423220 | -2.318022 |
| C              | 2.047017  | 1.245803  | -0.301240 | H               | 3.297558  | 0.352764  | 1.827959  |
| C              | 3.290620  | 0.370913  | 0.154437  | H               | -0.966300 | -1.175723 | 2.048461  |
| C              | 3.126030  | -1.082237 | -0.143644 | O               | 4.122355  | 0.392646  | -0.771505 |
| C              | 2.392730  | -1.921697 | 0.707650  | C               | 5.151361  | 0.867474  | 0.123947  |
| C              | 1.858584  | -1.557048 | 1.924959  | H               | 5.997056  | 1.109551  | -0.519003 |
| C              | 0.866445  | 1.070265  | 0.572228  | H               | 4.812216  | 1.762780  | 0.652348  |
| H              | 4.146266  | 0.770572  | -0.399201 | H               | 5.431333  | 0.083333  | 0.832407  |
| H              | 3.471030  | 0.562002  | 1.217471  | H               | -3.506265 | 0.301497  | -1.409561 |
| H              | 1.817482  | 0.982597  | -1.336955 | C               | -2.650845 | 2.776510  | -1.123688 |
| H              | 2.205044  | -2.936489 | 0.357917  | H               | -2.330962 | 3.746581  | -0.731770 |
| H              | 0.997588  | 1.403408  | 1.601770  | H               | -1.949125 | 2.483823  | -1.914604 |
| C              | -0.417247 | 0.659759  | 0.215252  | H               | -3.630986 | 2.909322  | -1.597191 |
| C              | -1.454083 | 0.706396  | 1.203987  |                 |           |           |           |
| C              | -0.772486 | 0.202986  | -1.098145 | <b>Int 4c-5</b> |           |           |           |
| C              | -2.746596 | 0.334583  | 0.920899  | C               | 1.298071  | 1.656242  | 0.760497  |
| H              | -1.201690 | 1.047948  | 2.203912  | C               | 3.215911  | -0.060732 | -1.224068 |
| C              | -2.056897 | -0.175734 | -1.385936 | C               | 3.758541  | -1.055820 | -0.495256 |
| H              | -0.018881 | 0.150150  | -1.875522 | C               | 4.970074  | -0.870597 | 0.330383  |
| C              | -3.062938 | -0.115067 | -0.385158 | C               | 5.946709  | 0.022123  | 0.116451  |
| H              | -3.509112 | 0.383412  | 1.689003  | C               | 0.367378  | 0.676227  | 1.058599  |
| H              | -2.336789 | -0.524583 | -2.374295 | H               | 2.343229  | -0.231140 | -1.849132 |
| O              | -4.273504 | -0.503258 | -0.772100 | H               | 3.642598  | 0.938547  | -1.239838 |
| C              | -5.369638 | -0.491035 | 0.164438  | H               | 5.071046  | -1.559327 | 1.170306  |
| H              | -6.231553 | -0.846715 | -0.399765 | H               | 0.710712  | -0.082828 | 1.758087  |
| H              | -5.166789 | -1.165701 | 1.001517  | C               | -0.968522 | 0.491090  | 0.602250  |
| H              | -5.553905 | 0.524431  | 0.527095  | C               | -1.661635 | -0.672919 | 1.072442  |

|                |           |           |           |               |           |           |           |
|----------------|-----------|-----------|-----------|---------------|-----------|-----------|-----------|
| C              | 2.459336  | 2.739132  | -0.251195 | C             | -1.678114 | 1.372058  | -0.277784 |
| H              | 1.643142  | 3.385638  | -0.588584 | C             | -2.950058 | -0.961309 | 0.695887  |
| H              | 2.739850  | 3.036903  | 0.765135  | H             | -1.140034 | -1.346492 | 1.745933  |
| H              | 3.320334  | 2.898462  | -0.909194 | C             | -2.964041 | 1.097812  | -0.659078 |
| C              | 3.679121  | -1.593421 | -1.438044 | H             | -1.205721 | 2.270431  | -0.648625 |
| H              | 4.778562  | -1.544179 | -1.437717 | C             | -3.621765 | -0.073950 | -0.184613 |
| H              | 3.385945  | -2.629508 | -1.633039 | H             | -3.442432 | -1.852289 | 1.065981  |
| H              | 3.350382  | -0.973113 | -2.284835 | H             | -3.509601 | 1.758820  | -1.324265 |
| H              | 1.236250  | -2.250996 | 2.482616  | O             | -4.858864 | -0.244729 | -0.621442 |
| H              | 2.074889  | -0.609761 | 2.406549  | C             | -5.630326 | -1.395771 | -0.209359 |
| <b>Int4a-1</b> |           |           |           | H             | -6.590428 | -1.287049 | -0.712323 |
| C              | -0.823862 | 2.028757  | -0.072322 | H             | -5.138006 | -2.317196 | -0.531513 |
| C              | -2.539674 | -1.443736 | 0.573160  | H             | -5.770048 | -1.389441 | 0.874957  |
| C              | -3.687419 | -1.518304 | -0.114544 | C             | 3.145337  | -2.435131 | -0.457705 |
| C              | -4.965470 | -0.863701 | 0.243649  | H             | 3.856552  | -3.191382 | -0.815895 |
| C              | -5.321523 | -0.626972 | 1.517024  | H             | 2.882388  | -2.718583 | 0.570688  |
| C              | -0.050977 | 1.080291  | -0.701159 | H             | 2.241979  | -2.495213 | -1.072305 |
| H              | -1.651622 | -1.978578 | 0.245790  | H             | 6.801564  | 0.089670  | 0.784373  |
| H              | -2.449403 | -0.859074 | 1.486164  | H             | 5.936411  | 0.702886  | -0.732071 |
| H              | -0.426085 | 2.570906  | 0.782855  | C             | 1.186950  | 2.825244  | -0.158697 |
| H              | -0.482756 | 0.568209  | -1.558815 | H             | 0.879253  | 2.527904  | -1.168569 |
| C              | 1.275049  | 0.701515  | -0.343912 | H             | 0.434559  | 3.539308  | 0.207264  |
| C              | 1.935326  | -0.284326 | -1.145253 | H             | 2.141011  | 3.352185  | -0.228209 |
| C              | 1.989519  | 1.248102  | 0.772895  | H             | 2.238821  | 1.561610  | 1.296992  |
| C              | 3.212969  | -0.705344 | -0.871903 |               |           |           |           |
| H              | 1.402025  | -0.704260 | -1.993057 | <b>TS5a-5</b> |           |           |           |
| C              | 3.262280  | 0.838454  | 1.056363  | C             | 1.526571  | -0.188562 | 0.298336  |
| H              | 1.521510  | 1.992158  | 1.407331  | C             | 2.709994  | -0.806327 | -1.414456 |
| C              | 3.898166  | -0.144334 | 0.239579  | C             | 2.325139  | -0.079453 | -2.537411 |
| H              | 3.688647  | -1.453225 | -1.494551 | C             | 1.356780  | -0.466724 | -3.530644 |
| H              | 3.815751  | 1.241514  | 1.897899  | C             | 0.699874  | -1.659728 | -3.481942 |
| O              | 5.126939  | -0.467594 | 0.601171  | C             | 0.300623  | -0.812821 | 0.015843  |
| C              | 5.877607  | -1.460116 | -0.137115 | H             | 3.603083  | -0.482848 | -0.888093 |
| H              | 6.832604  | -1.534071 | 0.381542  | H             | 2.488202  | -1.865322 | -1.333877 |
| H              | 5.358061  | -2.421374 | -0.111382 | H             | -0.040088 | -1.918370 | -4.233766 |
| H              | 6.030755  | -1.127839 | -1.167221 | H             | 0.886256  | -2.401596 | -2.712314 |
| C              | -2.201507 | 2.379643  | -0.489540 | C             | 1.793992  | 1.288238  | 0.437232  |
| H              | -2.264068 | 3.455574  | -0.709573 | H             | 1.549423  | 1.862017  | -0.459455 |
| H              | -2.534187 | 1.811257  | -1.361802 | H             | 1.204778  | 1.695855  | 1.269748  |
| H              | -2.900491 | 2.207169  | 0.342120  | H             | 2.849888  | 1.457250  | 0.667246  |
| H              | -6.257962 | -0.130545 | 1.760233  | H             | 2.187061  | -0.817683 | 0.891236  |
| H              | -4.699869 | -0.934355 | 2.354408  | C             | -0.941738 | -0.300482 | -0.451424 |
| H              | -3.700397 | -2.088804 | -1.044694 | C             | -1.242829 | 1.076875  | -0.679440 |
| C              | -5.863599 | -0.502141 | -0.916808 | C             | -1.988208 | -1.241206 | -0.685971 |
| H              | -5.363656 | 0.190579  | -1.607105 | C             | -2.486857 | 1.467338  | -1.117076 |

|             |           |           |           |               |           |           |           |
|-------------|-----------|-----------|-----------|---------------|-----------|-----------|-----------|
| H           | -6.121871 | -1.394806 | -1.502835 | H             | -0.495844 | 1.837527  | -0.500519 |
| H           | -6.793817 | -0.036402 | -0.577351 | C             | -3.240098 | -0.860011 | -1.124707 |
| <b>P0-1</b> |           |           |           | H             | -1.788671 | -2.295128 | -0.512622 |
| C           | 1.780650  | 1.253295  | -0.676365 | C             | -3.503368 | 0.508913  | -1.345833 |
| C           | 2.138578  | -0.110485 | -1.292271 | H             | -2.717974 | 2.513913  | -1.287932 |
| C           | 2.751377  | -1.092081 | -0.316103 | H             | -4.005670 | -1.608215 | -1.290456 |
| C           | 2.652444  | -0.915351 | 1.012527  | H             | 0.307596  | -1.891586 | 0.162200  |
| C           | 1.951459  | 0.241287  | 1.672214  | O             | -4.674809 | 1.001431  | -1.762581 |
| C           | 1.065978  | 1.065408  | 0.716899  | C             | -5.772509 | 0.109286  | -2.020024 |
| H           | 1.251476  | -0.572455 | -1.751362 | H             | -6.598868 | 0.750376  | -2.328294 |
| H           | 2.837351  | 0.055267  | -2.124429 | H             | -5.525213 | -0.588212 | -2.826562 |
| H           | 1.076658  | 1.760602  | -1.346732 | H             | -6.049482 | -0.439941 | -1.114432 |
| H           | 3.109937  | -1.643966 | 1.681501  | H             | 2.763230  | 0.909832  | -2.659205 |
| H           | 1.355893  | -0.115981 | 2.523036  | C             | 1.085585  | 0.525068  | -4.639171 |
| H           | 2.696980  | 0.919283  | 2.113224  | H             | 0.354326  | 0.138191  | -5.354401 |
| C           | 3.013734  | 2.156438  | -0.524555 | H             | 0.703130  | 1.469950  | -4.233382 |
| H           | 2.752754  | 3.111882  | -0.054220 | H             | 2.007220  | 0.760992  | -5.185658 |
| H           | 3.797028  | 1.683355  | 0.077336  |               |           |           |           |
| H           | 3.438980  | 2.373625  | -1.511478 | <b>TS5b-5</b> |           |           |           |
| C           | 3.451902  | -2.279754 | -0.919635 | C             | 1.558447  | -0.302527 | -0.246830 |
| H           | 4.308538  | -1.962884 | -1.530998 | C             | 2.806207  | -0.797031 | -1.098814 |
| H           | 3.816203  | -2.972433 | -0.153795 | C             | 2.826847  | -0.147343 | -2.437147 |
| H           | 2.781696  | -2.834412 | -1.591920 | C             | 1.832980  | -0.365961 | -3.383083 |
| H           | 0.944646  | 2.077895  | 1.124736  | C             | 0.913020  | -1.398897 | -3.180587 |
| C           | -0.321607 | 0.528336  | 0.529451  | C             | 0.279456  | -0.909530 | -0.727997 |
| C           | -1.340735 | 1.430079  | 0.082932  | H             | 3.705195  | -0.543392 | -0.531362 |
| C           | -0.676722 | -0.833661 | 0.748774  | H             | 2.756754  | -1.890716 | -1.166849 |
| C           | -2.624985 | 1.016534  | -0.158702 | H             | 0.022673  | -1.477575 | -3.799517 |
| H           | -1.079723 | 2.473200  | -0.068202 | H             | 1.163847  | -2.276969 | -2.598617 |
| C           | -1.953907 | -1.273353 | 0.513480  | C             | 1.629638  | 1.204886  | 0.014124  |
| H           | 0.072997  | -1.534713 | 1.095891  | H             | 1.556824  | 1.795195  | -0.904082 |
| C           | -2.950339 | -0.357123 | 0.047436  | H             | 0.844716  | 1.530379  | 0.703502  |
| H           | -3.376867 | 1.717885  | -0.498682 | H             | 2.594553  | 1.437598  | 0.477555  |
| H           | -2.243265 | -2.307220 | 0.670996  | H             | 1.703063  | -0.814499 | 0.719411  |
| O           | -4.139008 | -0.880959 | -0.156762 | C             | -1.011664 | -0.372874 | -0.928308 |
| C           | -5.248870 | -0.074818 | -0.631521 | C             | -1.331965 | 1.015070  | -1.075539 |
| H           | -5.009108 | 0.343749  | -1.611839 | C             | -2.099284 | -1.300889 | -0.982966 |
| H           | -6.084526 | -0.768587 | -0.706348 | C             | -2.631696 | 1.426398  | -1.238505 |
| H           | -5.469323 | 0.715071  | 0.090014  | H             | -0.548267 | 1.759135  | -1.076727 |
| <b>PI</b>   |           |           |           | C             | -3.407357 | -0.895464 | -1.132728 |
| C           | 1.912979  | 1.226949  | -0.627929 | H             | -1.882899 | -2.361465 | -0.888275 |
| C           | 2.273240  | -0.154516 | -1.207488 | C             | -3.689867 | 0.483225  | -1.259156 |
| C           | 2.792353  | -1.130865 | -0.171633 | H             | -2.877873 | 2.477072  | -1.353290 |
| C           | 2.556781  | -0.944889 | 1.135623  | H             | -4.202806 | -1.630615 | -1.153736 |
| C           | 1.795519  | 0.223511  | 1.711189  | H             | 0.291318  | -1.994210 | -0.644804 |

|           |           |           |           |               |           |           |           |
|-----------|-----------|-----------|-----------|---------------|-----------|-----------|-----------|
| C         | 1.047374  | 1.074831  | 0.658746  | O             | -4.912820 | 0.994118  | -1.408629 |
| H         | 1.392732  | -0.594623 | -1.700384 | C             | -6.056008 | 0.119032  | -1.421234 |
| H         | 3.021973  | -0.033157 | -2.003595 | H             | -6.916537 | 0.772666  | -1.563752 |
| H         | 1.306901  | 1.759323  | -1.372783 | H             | -5.990931 | -0.594145 | -2.248763 |
| H         | 2.947503  | -1.666578 | 1.854521  | H             | -6.146201 | -0.411928 | -0.468384 |
| H         | 1.087486  | -0.133033 | 2.472021  | H             | 3.541092  | 0.655144  | -2.605914 |
| H         | 2.498439  | 0.870294  | 2.258194  | C             | 1.669507  | 0.564500  | -4.566952 |
| C         | 3.168287  | 2.074110  | -0.366608 | H             | 1.701568  | 0.013532  | -5.513765 |
| H         | 2.906092  | 3.045610  | 0.071165  | H             | 0.701233  | 1.078664  | -4.523602 |
| H         | 3.865241  | 1.574689  | 0.315748  | H             | 2.455286  | 1.325729  | -4.585823 |
| H         | 3.706187  | 2.264853  | -1.303501 |               |           |           |           |
| C         | 3.558018  | -2.319204 | -0.693197 | <b>TS5c-5</b> |           |           |           |
| H         | 4.467901  | -2.004389 | -1.223980 | C             | 0.554033  | 0.517659  | 0.790858  |
| H         | 3.853028  | -3.001193 | 0.112115  | C             | 1.103171  | 0.234277  | -1.747664 |
| H         | 2.960417  | -2.890024 | -1.418800 | C             | 2.355133  | -0.444646 | -1.697692 |
| H         | 0.926893  | 2.083367  | 1.075433  | C             | 3.534779  | 0.134478  | -1.122591 |
| C         | -0.359920 | 0.580305  | 0.333723  | C             | 3.636972  | 1.384148  | -0.601032 |
| C         | -1.323044 | 1.507931  | -0.099874 | C             | -0.010197 | -0.267586 | -0.247990 |
| C         | -0.750825 | -0.763642 | 0.427022  | H             | 0.404336  | -0.147902 | -2.486113 |
| C         | -2.621828 | 1.119272  | -0.425722 | H             | 1.103943  | 1.318121  | -1.684180 |
| H         | -1.050368 | 2.558383  | -0.180851 | H             | 4.414682  | -0.505981 | -1.096765 |
| C         | -2.050355 | -1.166609 | 0.107548  | H             | 0.309059  | -1.308904 | -0.208555 |
| H         | -0.035781 | -1.512735 | 0.753178  | C             | -1.420614 | -0.122110 | -0.704083 |
| C         | -2.988438 | -0.226332 | -0.320758 | C             | -2.224762 | -1.269343 | -0.766999 |
| H         | -3.351530 | 1.849957  | -0.764507 | C             | -1.987063 | 1.105350  | -1.100298 |
| H         | -2.342229 | -2.210717 | 0.182378  | C             | -3.558316 | -1.208337 | -1.170693 |
| O         | -4.256522 | -0.642742 | -0.677898 | H             | -1.807425 | -2.232371 | -0.482368 |
| C         | -5.261071 | -0.398690 | 0.310518  | C             | -3.308478 | 1.180089  | -1.514935 |
| H         | -5.351392 | 0.671075  | 0.540765  | H             | -1.386661 | 2.010197  | -1.102815 |
| H         | -6.205166 | -0.755833 | -0.109315 | C             | -4.109820 | 0.024550  | -1.547464 |
| H         | -5.046571 | -0.946296 | 1.238416  | H             | -4.150832 | -2.115500 | -1.192703 |
| <b>R2</b> |           |           |           | H             | -3.743545 | 2.125700  | -1.823955 |
| C         | -0.835763 | -0.618763 | 0.000005  | O             | -5.387735 | 0.204155  | -1.962860 |
| C         | 0.454382  | 0.111108  | -0.000021 | C             | -6.253456 | -0.931340 | -2.020756 |
| C         | -2.071251 | -0.100278 | -0.000003 | H             | -7.213832 | -0.552201 | -2.374718 |
| C         | 0.555613  | 1.450439  | 0.000003  | H             | -5.878560 | -1.683865 | -2.724402 |
| C         | 1.685163  | -0.766413 | -0.000004 | H             | -6.385066 | -1.383738 | -1.030736 |
| H         | 1.702214  | -1.423680 | 0.880342  | C             | 2.440279  | -1.862704 | -2.174631 |
| H         | 1.701973  | -1.424127 | -0.880010 | H             | 3.264807  | -1.973794 | -2.891250 |
| H         | 2.605415  | -0.174120 | -0.000255 | H             | 2.670662  | -2.538841 | -1.338517 |
| H         | -2.946603 | -0.744582 | 0.000007  | H             | 1.515927  | -2.197669 | -2.651226 |
| H         | -2.260803 | 0.971078  | -0.000025 | H             | 4.570739  | 1.721238  | -0.160420 |
| H         | 1.525169  | 1.942062  | -0.000024 | H             | 2.820658  | 2.100956  | -0.608171 |
| H         | -0.314894 | 2.102143  | 0.000065  | C             | 0.013763  | 1.754575  | 1.395752  |
| H         | -0.741334 | -1.705334 | 0.000023  | H             | 0.499445  | 2.640147  | 0.952060  |

|               |           |           |           |             |           |           |           |
|---------------|-----------|-----------|-----------|-------------|-----------|-----------|-----------|
| <b>TS1a-1</b> |           |           |           | H           | -1.065140 | 1.864452  | 1.268763  |
| C             | -2.255984 | -1.472286 | -0.465085 | H           | 0.269437  | 1.781414  | 2.462063  |
| C             | -3.212705 | 0.388009  | 0.288040  | H           | 1.527583  | 0.192217  | 1.151638  |
| C             | -2.437230 | 1.494185  | -0.039461 |             |           |           |           |
| C             | -1.455543 | 2.063050  | 0.859858  | <b>P0-5</b> |           |           |           |
| C             | -1.206372 | 1.670362  | 2.130887  | C           | 1.556944  | -1.426029 | 0.295131  |
| C             | -1.110518 | -1.562797 | 0.330628  | C           | 1.949356  | 1.076175  | -0.102958 |
| H             | -4.064342 | 0.156327  | -0.342791 | C           | 3.414186  | 0.750556  | -0.306892 |
| H             | -3.278145 | 0.037382  | 1.312336  | C           | 3.846996  | -0.517727 | -0.369494 |
| H             | -2.154747 | -1.083418 | -1.474835 | C           | 2.966026  | -1.734346 | -0.245549 |
| H             | -0.873199 | 2.890218  | 0.456679  | C           | 1.046033  | -0.123092 | -0.438384 |
| H             | -1.213710 | -2.091511 | 1.277989  | H           | 1.671825  | 1.929872  | -0.736182 |
| C             | 0.180367  | -1.033002 | 0.053762  | H           | 1.798766  | 1.412336  | 0.932157  |
| C             | 1.212498  | -1.212990 | 1.015835  | H           | 4.908272  | -0.704944 | -0.532769 |
| C             | 0.513257  | -0.341631 | -1.148870 | H           | 1.169882  | -0.347432 | -1.507669 |
| C             | 2.494366  | -0.739721 | 0.812067  | C           | 0.420173  | 0.083479  | -0.224345 |
| H             | 0.979633  | -1.740101 | 1.937150  | C           | 1.331672  | -0.699540 | -1.005900 |
| C             | 1.784752  | 0.138547  | -1.359756 | C           | 0.960924  | 0.993651  | 0.728110  |
| H             | -0.237134 | -0.201371 | -1.919597 | C           | 2.690495  | -0.595661 | -0.865002 |
| C             | 2.793265  | -0.052995 | -0.383618 | H           | 0.920760  | -1.389388 | -1.737018 |
| H             | 3.254223  | -0.896451 | 1.568093  | C           | 2.316707  | 1.117195  | 0.890043  |
| H             | 2.045384  | 0.662071  | -2.274128 | H           | 0.299379  | 1.601300  | 1.333800  |
| O             | 3.995940  | 0.449157  | -0.690497 | C           | 3.207225  | 0.323452  | 0.095321  |
| C             | 5.087825  | 0.280694  | 0.228446  | H           | 3.357479  | -1.192984 | -1.474561 |
| H             | 5.945701  | 0.752276  | -0.251859 | H           | 2.749338  | 1.805765  | 1.608296  |
| H             | 4.877702  | 0.778687  | 1.181031  | O           | 4.485557  | 0.520241  | 0.326891  |
| H             | 5.295293  | -0.781260 | 0.395623  | C           | 5.505638  | -0.212867 | -0.402187 |
| C             | -3.404664 | -2.419511 | -0.239476 | H           | 6.450433  | 0.153525  | -0.004672 |
| H             | -3.171809 | -3.375854 | -0.729059 | H           | 5.426429  | 0.007084  | -1.469612 |
| H             | -3.564251 | -2.621787 | 0.824515  | H           | 5.397707  | -1.283388 | -0.211576 |
| H             | -4.336530 | -2.052141 | -0.677749 | C           | 4.342074  | 1.930474  | -0.425643 |
| C             | -2.566806 | 2.131768  | -1.394770 | H           | 5.385986  | 1.615931  | -0.528177 |
| H             | -2.896602 | 3.175031  | -1.292718 | H           | 4.085268  | 2.553860  | -1.293966 |
| H             | -1.597530 | 2.166256  | -1.909015 | H           | 4.268604  | 2.583322  | 0.455953  |
| H             | -3.285296 | 1.607634  | -2.030356 | H           | 2.892597  | -2.232950 | -1.224279 |
| H             | -0.437179 | 2.162930  | 2.718741  | H           | 3.444856  | -2.467574 | 0.419458  |
| H             | -1.754038 | 0.871739  | 2.623009  | C           | 1.537620  | -1.310821 | 1.825109  |
| <b>TS1b-1</b> |           |           |           | H           | 2.241536  | -0.555310 | 2.190146  |
| C             | 2.036087  | 1.152211  | -0.398124 | H           | 0.540922  | -1.061670 | 2.206665  |
| C             | 3.361681  | 0.449147  | 0.101254  | H           | 1.828242  | -2.270762 | 2.267486  |
| C             | 3.254348  | -1.035459 | -0.003521 | H           | 0.890813  | -2.247907 | 0.007223  |
| C             | 2.375088  | -1.718645 | 0.836073  | <b>P5</b>   |           |           |           |
| C             | 1.728735  | -1.121128 | 1.904702  | C           | 1.556944  | -1.426029 | 0.295131  |
| C             | 0.876655  | 0.993277  | 0.521939  | C           | 1.949356  | 1.076175  | -0.102958 |
| H             | 4.176035  | 0.819682  | -0.527933 | C           | 3.414186  | 0.750556  | -0.306892 |

|               |           |           |           |                |           |           |           |
|---------------|-----------|-----------|-----------|----------------|-----------|-----------|-----------|
| H             | 3.559685  | 0.781756  | 1.127193  | C              | 3.846996  | -0.517727 | -0.369494 |
| H             | 1.803049  | 0.746765  | -1.386504 | C              | 2.966026  | -1.734346 | -0.245549 |
| H             | 2.122770  | -2.748120 | 0.585882  | C              | 1.046033  | -0.123092 | -0.438384 |
| H             | 0.981228  | 1.486894  | 1.486695  | H              | 1.671825  | 1.929872  | -0.736182 |
| C             | -0.425102 | 0.578300  | 0.184664  | H              | 1.798766  | 1.412336  | 0.932157  |
| C             | -1.474224 | 0.772460  | 1.134293  | H              | 4.908272  | -0.704944 | -0.532769 |
| C             | -0.770495 | -0.023245 | -1.066771 | H              | 1.169882  | -0.347432 | -1.507669 |
| C             | -2.776216 | 0.408414  | 0.868328  | C              | 0.420173  | 0.083479  | -0.224345 |
| H             | -1.231088 | 1.224378  | 2.092029  | C              | 1.331672  | -0.699540 | -1.005900 |
| C             | -2.064267 | -0.394756 | -1.337380 | C              | 0.960924  | 0.993651  | 0.728110  |
| H             | -0.004426 | -0.197165 | -1.814329 | C              | 2.690495  | -0.595661 | -0.865002 |
| C             | -3.086037 | -0.184429 | -0.377219 | H              | 0.920760  | -1.389388 | -1.737018 |
| H             | -3.548143 | 0.576569  | 1.609226  | C              | 2.316707  | 1.117195  | 0.890043  |
| H             | -2.333871 | -0.852359 | -2.283785 | H              | 0.299379  | 1.601300  | 1.333800  |
| O             | -4.307581 | -0.580930 | -0.742460 | C              | 3.207225  | 0.323452  | 0.095321  |
| C             | -5.410952 | -0.424265 | 0.168122  | H              | 3.357479  | -1.192984 | -1.474561 |
| H             | -6.277201 | -0.825756 | -0.358063 | H              | 2.749338  | 1.805765  | 1.608296  |
| H             | -5.239174 | -0.992712 | 1.087803  | O              | 4.485557  | 0.520241  | 0.326891  |
| H             | -5.575571 | 0.632949  | 0.399501  | C              | 5.505638  | -0.212867 | -0.402187 |
| C             | 2.311657  | 2.669875  | -0.547449 | H              | 6.450433  | 0.153525  | -0.004672 |
| H             | 1.432381  | 3.196362  | -0.931744 | H              | 5.426429  | 0.007084  | -1.469612 |
| H             | 2.588501  | 3.115777  | 0.414379  | H              | 5.397707  | -1.283388 | -0.211576 |
| H             | 3.137824  | 2.822878  | -1.250266 | C              | 4.342074  | 1.930474  | -0.425643 |
| C             | 3.957307  | -1.723422 | -1.127510 | H              | 5.385986  | 1.615931  | -0.528177 |
| H             | 5.047175  | -1.632696 | -1.009355 | H              | 4.085268  | 2.553860  | -1.293966 |
| H             | 3.703801  | -2.785926 | -1.186926 | H              | 4.268604  | 2.583322  | 0.455953  |
| H             | 3.718681  | -1.248414 | -2.090380 | H              | 2.892597  | -2.232950 | -1.224279 |
| H             | 0.932018  | -1.642114 | 2.428321  | H              | 3.444856  | -2.467574 | 0.419458  |
| H             | 2.101374  | -0.221315 | 2.379532  | C              | 1.537620  | -1.310821 | 1.825109  |
| <b>TS1c-1</b> |           |           |           | H              | 2.241536  | -0.555310 | 2.190146  |
| C             | -1.421875 | 1.510642  | 0.395181  | H              | 0.540922  | -1.061670 | 2.206665  |
| C             | -1.526496 | -0.974790 | -0.355203 | H              | 1.828242  | -2.270762 | 2.267486  |
| C             | -2.901341 | -0.984845 | -0.762080 | H              | 0.890813  | -2.247907 | 0.007223  |
| C             | -4.028396 | -0.828543 | 0.091735  |                |           |           |           |
| C             | -3.876407 | -0.640864 | 1.440951  | <b>Int2a-6</b> |           |           |           |
| C             | -0.697575 | 0.639953  | -0.472173 | C              | -1.177501 | 2.085785  | 0.846115  |
| H             | -0.871741 | -1.490480 | -1.056061 | C              | -3.237064 | 0.618439  | -1.484477 |
| H             | -1.324547 | -1.261517 | 0.673933  | C              | -4.188901 | 0.026300  | -0.747456 |
| H             | -1.106301 | 1.609463  | 1.431596  | C              | -4.162577 | -1.360756 | -0.235723 |
| H             | -0.871380 | 0.861245  | -1.526965 | C              | -3.514489 | -2.351725 | -0.870861 |
| C             | 0.746396  | 0.361516  | -0.173288 | C              | -0.399698 | 0.966867  | 1.085046  |
| C             | 1.664391  | 0.342433  | -1.229344 | H              | -3.354435 | 1.639223  | -1.838936 |
| C             | 1.219992  | 0.103230  | 1.125672  | H              | -2.323994 | 0.101555  | -1.771314 |
| C             | 3.020443  | 0.091486  | -1.013891 | H              | -2.140675 | 2.077865  | 1.350448  |
| H             | 1.319941  | 0.533435  | -2.242919 | C              | -0.882142 | 3.294897  | 0.026011  |

|                                           |           |           |           |               |           |           |           |
|-------------------------------------------|-----------|-----------|-----------|---------------|-----------|-----------|-----------|
| C                                         | 2.564126  | -0.150747 | 1.355692  | H             | 0.020611  | 3.808527  | 0.384602  |
| H                                         | 0.534004  | 0.096054  | 1.968948  | H             | -0.703933 | 3.037065  | -1.026368 |
| C                                         | 3.478562  | -0.159273 | 0.286701  | H             | -1.714720 | 4.000581  | 0.067221  |
| H                                         | 3.701843  | 0.092820  | -1.856333 | H             | -3.496997 | -3.363418 | -0.472795 |
| H                                         | 2.931205  | -0.349728 | 2.358013  | H             | -2.997943 | -2.189398 | -1.813701 |
| O                                         | 4.768875  | -0.420407 | 0.615356  | C             | 0.900333  | 0.621153  | 0.618886  |
| C                                         | 5.743593  | -0.464794 | -0.428754 | C             | 1.707503  | 1.408425  | -0.267391 |
| H                                         | 6.691253  | -0.695406 | 0.061134  | C             | 1.444306  | -0.624888 | 1.077820  |
| H                                         | 5.510981  | -1.249991 | -1.158154 | C             | 2.946688  | 0.977667  | -0.656744 |
| H                                         | 5.824773  | 0.501197  | -0.941172 | H             | 1.344372  | 2.355016  | -0.642027 |
| C                                         | -2.571939 | 2.306221  | -0.064381 | C             | 2.685820  | -1.067563 | 0.697423  |
| H                                         | -2.180850 | 3.277136  | -0.421317 | H             | 0.846785  | -1.231715 | 1.750981  |
| H                                         | -3.077923 | 1.848719  | -0.922993 | C             | 3.459013  | -0.266440 | -0.183391 |
| H                                         | -3.282717 | 2.524574  | 0.737191  | H             | 3.564646  | 1.563451  | -1.329062 |
| H                                         | -4.739054 | -0.469746 | 2.078526  | H             | 3.067008  | -2.012375 | 1.064268  |
| H                                         | -2.909630 | -0.666430 | 1.933570  | O             | 4.663220  | -0.585602 | -0.623158 |
| H                                         | -3.097616 | -1.066759 | -1.829923 | C             | 5.291810  | -1.826174 | -0.223533 |
| C                                         | -5.402339 | -0.846304 | -0.541892 | H             | 4.676691  | -2.677731 | -0.526233 |
| H                                         | -5.498846 | -0.058938 | -1.298950 | H             | 6.243351  | -1.842523 | -0.753510 |
| H                                         | -5.583762 | -1.803331 | -1.045605 | H             | 5.460485  | -1.831770 | 0.856612  |
| H                                         | -6.187436 | -0.700988 | 0.205078  | H             | -0.853555 | 0.225000  | 1.738851  |
| <b>[Ru(bpz)<sub>3</sub>]<sup>2+</sup></b> |           |           |           | H             | -5.064970 | 0.611653  | -0.463555 |
| Ru                                        | 0.229870  | 0.016553  | -0.013491 | C             | -4.942598 | -1.604209 | 1.035559  |
| N                                         | -1.327801 | -0.855382 | 1.063734  | H             | -6.000812 | -1.342916 | 0.898969  |
| N                                         | -0.070898 | -1.753961 | -1.073225 | H             | -4.889259 | -2.651316 | 1.348620  |
| N                                         | -1.158123 | 1.179988  | -1.045971 | H             | -4.571432 | -0.978631 | 1.858494  |
| C                                         | -1.949406 | -0.330886 | 2.129299  |               |           |           |           |
| H                                         | -1.626776 | 0.644968  | 2.469124  | <b>Int3-6</b> |           |           |           |
| C                                         | -2.973029 | -1.031581 | 2.765688  | C             | 1.741589  | 1.679641  | -0.494546 |
| H                                         | -3.473404 | -0.602298 | 3.628115  | C             | 2.887010  | 1.152478  | 0.495117  |
| C                                         | -2.759982 | -2.749438 | 1.283191  | C             | 3.723572  | 0.037114  | -0.025194 |
| H                                         | -3.099081 | -3.721074 | 0.940390  | C             | 3.597574  | -1.325859 | 0.300084  |
| C                                         | -1.723675 | -2.079179 | 0.621913  | C             | 2.629236  | -1.807140 | 1.161368  |
| C                                         | -1.010065 | -2.588209 | -0.553098 | C             | 0.766173  | 0.586071  | -0.688171 |
| C                                         | -1.234281 | -3.833235 | -1.152411 | H             | 3.521509  | 2.032637  | 0.652510  |
| H                                         | -1.966698 | -4.523617 | -0.746694 | H             | 2.418301  | 0.913011  | 1.453730  |
| C                                         | 0.341942  | -3.392581 | -2.739127 | H             | 2.247526  | 1.778654  | -1.467144 |
| H                                         | 0.887315  | -3.708748 | -3.623155 | C             | 1.262370  | 3.062186  | -0.048901 |
| C                                         | 0.599824  | -2.149726 | -2.163671 | H             | 0.460407  | 3.440068  | -0.691366 |
| H                                         | 1.339415  | -1.472020 | -2.569965 | H             | 0.914515  | 3.064053  | 0.989634  |
| C                                         | -1.840817 | 0.819823  | -2.142088 | H             | 2.099125  | 3.765426  | -0.113518 |
| H                                         | -1.657395 | -0.168959 | -2.543020 | H             | 2.548344  | -2.869835 | 1.370867  |
| C                                         | -2.751329 | 1.698570  | -2.727140 | H             | 1.925020  | -1.156637 | 1.670528  |
| H                                         | -3.299743 | 1.403898  | -3.616667 | C             | 0.583037  | 0.433964  | -0.390681 |
| C                                         | -2.307730 | 3.267341  | -1.134011 | C             | 1.430393  | 1.409293  | 0.245138  |

|                |           |           |           |                |           |           |           |
|----------------|-----------|-----------|-----------|----------------|-----------|-----------|-----------|
| H              | -2.507797 | 4.253738  | -0.727166 | C              | 1.184657  | -0.821054 | -0.755906 |
| C              | -1.371901 | 2.419406  | -0.530005 | C              | 2.749396  | 1.140453  | 0.484648  |
| N              | 1.911625  | 0.661598  | -1.068894 | H              | 1.030562  | 2.367136  | 0.543894  |
| C              | 1.926514  | 1.483801  | -2.127789 | C              | 2.509529  | -1.093674 | -0.528235 |
| H              | 0.975529  | 1.852618  | -2.490394 | H              | 0.559272  | -1.572608 | -1.228470 |
| C              | 3.131266  | 1.840401  | -2.730574 | C              | 3.312440  | -0.108885 | 0.100700  |
| H              | 3.136207  | 2.508456  | -3.586466 | H              | 3.395975  | 1.866931  | 0.965525  |
| C              | 4.288357  | 0.568740  | -1.236249 | H              | 2.929255  | -2.047926 | -0.821218 |
| H              | 5.244848  | 0.199495  | -0.883407 | O              | 4.597631  | -0.257981 | 0.375805  |
| C              | 3.099634  | 0.194625  | -0.599708 | C              | 5.283039  | -1.482240 | 0.030563  |
| C              | 3.017971  | -0.697506 | 0.560494  | H              | 4.841451  | -2.329263 | 0.562802  |
| N              | 1.763459  | -0.949511 | 1.019105  | H              | 6.311717  | -1.331639 | 0.356183  |
| C              | -0.562966 | 2.762065  | 0.642082  | H              | 5.251586  | -1.646133 | -1.050196 |
| N              | 0.285995  | 1.792055  | 1.074841  | H              | 1.217910  | -0.290206 | -1.150439 |
| C              | 1.064404  | 2.053183  | 2.134078  | H              | 4.490978  | 0.312114  | -0.747684 |
| H              | 1.738925  | 1.272850  | 2.462371  | C              | 4.572108  | -2.295680 | -0.345187 |
| C              | 0.990081  | 3.286975  | 2.778304  | H              | 5.603886  | -2.070671 | -0.048819 |
| H              | 1.617627  | 3.491286  | 3.640377  | H              | 4.358134  | -3.329655 | -0.058667 |
| C              | -0.603204 | 3.990885  | 1.309369  | H              | 4.532364  | -2.231632 | -1.439371 |
| H              | -1.267524 | 4.780123  | 0.974470  |                |           |           |           |
| C              | 1.621219  | -1.775610 | 2.065171  | <b>Int 4-6</b> |           |           |           |
| C              | 2.738937  | -2.342114 | 2.674834  | C              | -1.215398 | 1.890653  | 0.166426  |
| C              | 4.117301  | -1.277733 | 1.204469  | C              | -3.148694 | -0.889834 | 1.148787  |
| H              | 5.129805  | -1.080401 | 0.866340  | C              | -3.841375 | -1.132708 | 0.020900  |
| H              | 2.618829  | -3.008433 | 3.523523  | C              | -5.133170 | -0.478255 | -0.278407 |
| H              | 0.615860  | -1.975543 | 2.412431  | C              | -6.032754 | -0.054763 | 0.619650  |
| N              | -3.379189 | -2.234807 | 2.346690  | C              | -0.144844 | 1.369246  | 0.870851  |
| N              | -0.565258 | -4.235250 | -2.234460 | H              | -2.216774 | -1.407251 | 1.362248  |
| N              | 4.309038  | 1.384103  | -2.291716 | H              | -3.499838 | -0.184026 | 1.897320  |
| N              | 0.160871  | 4.253919  | 2.370769  | H              | -2.041980 | 2.224414  | 0.789314  |
| N              | -2.991217 | 2.914312  | -2.223933 | H              | -5.367360 | -0.371307 | -1.338758 |
| N              | 3.982921  | -2.091708 | 2.252842  | C              | -1.388841 | 2.084918  | -1.301370 |
| O              | -4.503803 | 0.274626  | 0.251772  | H              | -0.572710 | 2.683236  | -1.727649 |
| O              | -4.254269 | -0.544659 | -0.609671 | H              | -1.391325 | 1.123919  | -1.834193 |
|                |           |           |           | H              | -2.333566 | 2.590504  | -1.512166 |
| <b>Int2a-2</b> |           |           |           | C              | -3.327946 | -2.081145 | -1.036734 |
| C              | 1.426785  | 2.076228  | 0.670113  | H              | -4.038685 | -2.899296 | -1.213802 |
| C              | 3.300285  | 0.072905  | -1.171588 | H              | -3.203780 | -1.564825 | -1.998638 |
| C              | 3.902731  | -0.776329 | -0.316232 | H              | -2.365265 | -2.518426 | -0.755011 |
| C              | 3.297346  | -2.060750 | 0.092388  | H              | -6.957116 | 0.423844  | 0.306299  |
| C              | 2.425725  | -2.790147 | -0.618558 | H              | -5.886834 | -0.180934 | 1.690350  |
| C              | 0.566135  | 1.063332  | 1.054080  | C              | 1.097263  | 0.838398  | 0.420905  |
| H              | 3.783092  | 0.996227  | -1.481569 | C              | 2.028409  | 0.422511  | 1.430045  |
| H              | 2.328380  | -0.142174 | -1.607236 | C              | 1.490606  | 0.678418  | -0.948279 |
| H              | 2.360686  | 2.107793  | 1.226149  | C              | 3.257358  | -0.103997 | 1.121468  |



|                |          |           |           |             |           |           |           |
|----------------|----------|-----------|-----------|-------------|-----------|-----------|-----------|
| H              | 3.633341 | -2.447354 | 1.055643  | H           | 1.744378  | 0.537043  | 2.471906  |
| C              | 1.257312 | 3.129217  | -0.371223 | C           | 2.713543  | 0.155632  | -1.270515 |
| H              | 0.527722 | 3.884328  | -0.040423 | H           | 0.819016  | 0.962783  | -1.745800 |
| H              | 0.891561 | 2.724850  | -1.321529 | C           | 3.619033  | -0.245389 | -0.244310 |
| H              | 2.203832 | 3.644642  | -0.550450 | H           | 3.937382  | -0.404286 | 1.909000  |
| C              | 5.240445 | -0.456695 | 0.306601  | H           | 3.020637  | 0.028102  | -2.303254 |
| H              | 5.985219 | -1.223201 | 0.054135  | O           | 4.769004  | -0.739917 | -0.668129 |
| H              | 5.168711 | -0.442838 | 1.402833  | C           | 5.763920  | -1.206739 | 0.273035  |
| H              | 5.621261 | 0.513955  | -0.025168 | H           | 5.359314  | -2.025073 | 0.874691  |
| H              | 2.031188 | -3.726502 | -0.232276 | H           | 6.588372  | -1.564206 | -0.342583 |
| H              | 2.091846 | -2.492203 | -1.610115 | H           | 6.097725  | -0.382877 | 0.909324  |
| C              | 0.748666 | 0.742995  | 0.610913  | H           | -0.266283 | 1.366307  | 1.951720  |
| C              | 1.332215 | -0.463382 | 1.120508  |             |           |           |           |
| C              | 1.539585 | 1.532017  | -0.286626 | <b>P0-6</b> |           |           |           |
| C              | 2.585514 | -0.884337 | 0.750687  | C           | 1.878378  | 1.642920  | 0.112295  |
| H              | 0.752192 | -1.064597 | 1.813815  | C           | 2.187587  | -0.476045 | -1.263308 |
| C              | 2.793598 | 1.127415  | -0.658365 | C           | 2.919330  | -1.054198 | -0.073021 |
| H              | 1.157525 | 2.467691  | -0.670389 | C           | 2.934935  | -0.432498 | 1.118230  |
| C              | 3.335829 | -0.090724 | -0.154781 | C           | 2.266201  | 0.887377  | 1.389223  |
| H              | 2.992915 | -1.805812 | 1.147510  | C           | 1.210592  | 0.684295  | -0.948057 |
| H              | 3.401774 | 1.717967  | -1.335489 | H           | 1.659658  | -1.279347 | -1.795509 |
| H              | 0.961365 | 0.388126  | 1.810223  | H           | 2.927195  | -0.092894 | -1.982251 |
| O              | 4.549289 | -0.391527 | -0.587002 | H           | 2.809734  | 1.953987  | -0.379495 |
| C              | 5.205645 | -1.604637 | -0.153206 | H           | 3.461874  | -0.896470 | 1.951723  |
| H              | 4.611843 | -2.478923 | -0.433039 | C           | 1.059601  | 2.900801  | 0.410699  |
| H              | 6.158188 | -1.614156 | -0.681681 | H           | 0.814003  | 3.449194  | -0.506406 |
| H              | 5.373733 | -1.578248 | 0.926803  | H           | 0.122694  | 2.668709  | 0.931478  |
|                |          |           |           | H           | 1.634973  | 3.576166  | 1.055027  |
| <b>Int3b-2</b> |          |           |           | C           | 3.629611  | -2.360764 | -0.311760 |
| C              | 1.889153 | 1.270578  | -0.322264 | H           | 4.361805  | -2.269040 | -1.126611 |
| C              | 3.004165 | 0.611134  | 0.621381  | H           | 4.159778  | -2.703564 | 0.582703  |
| C              | 3.715842 | -0.570376 | 0.046965  | H           | 2.925129  | -3.147383 | -0.616697 |
| C              | 3.360006 | -1.892836 | 0.359385  | H           | 1.387108  | 0.739435  | 2.036776  |
| C              | 2.359090 | -2.298930 | 1.216574  | H           | 2.945848  | 1.525195  | 1.972683  |
| C              | 0.804858 | 0.289577  | -0.542557 | C           | -0.165308 | 0.227154  | -0.563433 |
| H              | 3.724204 | 1.420774  | 0.785411  | C           | -1.295830 | 1.003397  | -0.973824 |
| H              | 2.535565 | 0.389003  | 1.583802  | C           | -0.404607 | -0.950984 | 0.203237  |
| H              | 2.383615 | 1.357879  | -1.303420 | C           | -2.579973 | 0.661195  | -0.632571 |
| H              | 3.930776 | -2.674236 | -0.142545 | H           | -1.123607 | 1.892425  | -1.572044 |
| C              | 1.558159 | 2.677094  | 0.179285  | C           | -1.676720 | -1.314650 | 0.559458  |
| H              | 0.815214 | 3.169312  | -0.456178 | H           | 0.432460  | -1.564683 | 0.514402  |
| H              | 1.194979 | 2.670914  | 1.212544  | C           | -2.789798 | -0.514000 | 0.147216  |
| H              | 2.467505 | 3.286426  | 0.155489  | H           | -3.417085 | 1.269807  | -0.952395 |
| C              | 4.821794 | -0.288664 | -0.926104 | H           | -1.876451 | -2.206992 | 1.143574  |
| H              | 5.218212 | -1.204155 | -1.375959 | O           | -3.966909 | -0.957054 | 0.531128  |

|                |           |           |           |                |           |           |           |
|----------------|-----------|-----------|-----------|----------------|-----------|-----------|-----------|
| H              | 4.480427  | 0.372640  | -1.737178 | C              | -5.192127 | -0.267944 | 0.169614  |
| H              | 5.653754  | 0.239586  | -0.436810 | H              | -5.307783 | -0.267821 | -0.916907 |
| H              | 2.154010  | -3.355472 | 1.361472  | H              | -5.986288 | -0.846774 | 0.638180  |
| H              | 1.755954  | -1.603418 | 1.792406  | H              | -5.177366 | 0.750741  | 0.563490  |
| C              | -0.566778 | 0.294095  | -0.303682 | H              | 1.090363  | 1.289393  | -1.854729 |
| C              | -1.295007 | -0.879434 | -0.706201 |                |           |           |           |
| C              | -1.323782 | 1.359358  | 0.299550  | <b>P6</b>      |           |           |           |
| C              | -2.652997 | -0.993792 | -0.542982 | C              | 1.878378  | 1.642920  | 0.112295  |
| H              | -0.744497 | -1.699517 | -1.158091 | C              | 2.187587  | -0.476045 | -1.263308 |
| C              | -2.676460 | 1.249292  | 0.471803  | C              | 2.919330  | -1.054198 | -0.073021 |
| H              | -0.829037 | 2.261443  | 0.628251  | C              | 2.934935  | -0.432498 | 1.118230  |
| C              | -3.364266 | 0.078320  | 0.051000  | C              | 2.266201  | 0.887377  | 1.389223  |
| H              | -3.168328 | -1.891697 | -0.861297 | C              | 1.210592  | 0.684295  | -0.948057 |
| H              | -3.253872 | 2.046741  | 0.927354  | H              | 1.659658  | -1.279347 | -1.795509 |
| H              | 1.169274  | -0.629978 | -0.996768 | H              | 2.927195  | -0.092894 | -1.982251 |
| O              | -4.672604 | 0.083367  | 0.258775  | H              | 2.809734  | 1.953987  | -0.379495 |
| C              | -5.474302 | -1.051470 | -0.133376 | H              | 3.461874  | -0.896470 | 1.951723  |
| H              | -5.171134 | -1.943337 | 0.422047  | C              | 1.059601  | 2.900801  | 0.410699  |
| H              | -6.497189 | -0.780895 | 0.127274  | H              | 0.814003  | 3.449194  | -0.506406 |
| H              | -5.395452 | -1.222612 | -1.210675 | H              | 0.122694  | 2.668709  | 0.931478  |
|                |           |           |           | H              | 1.634973  | 3.576166  | 1.055027  |
| <b>Int4c-2</b> |           |           |           | C              | 3.629611  | -2.360764 | -0.311760 |
| C              | -1.046181 | 2.208798  | -0.005168 | H              | 4.361805  | -2.269040 | -1.126611 |
| C              | -2.842900 | -0.585481 | 1.735345  | H              | 4.159778  | -2.703564 | 0.582703  |
| C              | -3.330160 | -1.212770 | 0.655455  | H              | 2.925129  | -3.147383 | -0.616697 |
| C              | -4.608266 | -0.912531 | -0.026687 | H              | 1.387108  | 0.739435  | 2.036776  |
| C              | -5.126756 | 0.325613  | -0.075432 | H              | 2.945848  | 1.525195  | 1.972683  |
| C              | 0.043551  | 1.748343  | 0.710632  | C              | -0.165308 | 0.227154  | -0.563433 |
| H              | -1.890734 | -0.875606 | 2.172165  | C              | -1.295830 | 1.003397  | -0.973824 |
| H              | -3.386242 | 0.215130  | 2.232536  | C              | -0.404607 | -0.950984 | 0.203237  |
| H              | -1.789693 | 2.729089  | 0.595048  | C              | -2.579973 | 0.661195  | -0.632571 |
| C              | -1.340464 | 2.119124  | -1.461993 | H              | -1.123607 | 1.892425  | -1.572044 |
| H              | -0.464801 | 2.340089  | -2.081775 | C              | -1.676720 | -1.314650 | 0.559458  |
| H              | -1.678145 | 1.104311  | -1.723588 | H              | 0.432460  | -1.564683 | 0.514402  |
| H              | -2.145549 | 2.807500  | -1.730258 | C              | -2.789798 | -0.514000 | 0.147216  |
| H              | -6.077628 | 0.522740  | -0.564751 | H              | -3.417085 | 1.269807  | -0.952395 |
| H              | -4.618092 | 1.180052  | 0.364258  | H              | -1.876451 | -2.206992 | 1.143574  |
| C              | 1.177283  | 0.993773  | 0.295858  | O              | -3.966909 | -0.957054 | 0.531128  |
| C              | 2.212432  | 0.788618  | 1.268385  | C              | -5.192127 | -0.267944 | 0.169614  |
| C              | 1.357125  | 0.404671  | -0.998984 | H              | -5.307783 | -0.267821 | -0.916907 |
| C              | 3.355822  | 0.085999  | 0.983806  | H              | -5.986288 | -0.846774 | 0.638180  |
| H              | 2.083423  | 1.218328  | 2.257334  | H              | -5.177366 | 0.750741  | 0.563490  |
| C              | 2.489941  | -0.303023 | -1.294828 | H              | 1.090363  | 1.289393  | -1.854729 |
| H              | 0.588116  | 0.499688  | -1.753197 |                |           |           |           |
| C              | 3.512938  | -0.469539 | -0.314203 | <b>TS 6a-6</b> |           |           |           |

|               |           |           |           |               |           |           |           |
|---------------|-----------|-----------|-----------|---------------|-----------|-----------|-----------|
| H             | 4.122008  | -0.039086 | 1.739019  | C             | 1.640319  | -0.600847 | 0.505891  |
| H             | 2.636153  | -0.758504 | -2.268631 | C             | 2.497489  | -0.606668 | -1.512751 |
| O             | 4.564918  | -1.162053 | -0.711984 | C             | 1.638262  | 0.058710  | -2.382177 |
| C             | 5.666654  | -1.420996 | 0.189641  | C             | 0.635402  | -0.527539 | -3.235870 |
| H             | 5.320250  | -2.000566 | 1.049304  | C             | 0.441125  | -1.873209 | -3.311577 |
| H             | 6.378374  | -2.001949 | -0.395224 | C             | 0.695338  | -1.623058 | 0.326169  |
| H             | 6.120240  | -0.480220 | 0.512488  | H             | 3.338169  | -0.047895 | -1.113929 |
| H             | 0.043917  | 2.011448  | 1.766073  | H             | 2.644720  | -1.679601 | -1.581146 |
| H             | -2.766053 | -2.050319 | 0.241745  | H             | 1.233575  | 0.396114  | 0.360300  |
| C             | -5.290138 | -2.089091 | -0.686148 | C             | 2.884157  | -0.652583 | 1.353161  |
| H             | -4.631392 | -2.557099 | -1.430399 | H             | 2.612125  | -0.802299 | 2.406972  |
| H             | -5.534129 | -2.868176 | 0.048475  | H             | 3.565628  | -1.458621 | 1.066182  |
| H             | -6.214657 | -1.789485 | -1.188826 | H             | 3.426701  | 0.294079  | 1.284177  |
| <b>TS2a-2</b> |           |           |           | H             | -0.331352 | -2.290393 | -3.951479 |
| C             | 1.605702  | -0.685104 | 0.557167  | H             | 1.048892  | -2.583391 | -2.759788 |
| C             | 2.715213  | -0.632063 | -1.669673 | C             | 0.689171  | -2.994922 | 0.708465  |
| C             | 1.819726  | 0.086471  | -2.473247 | C             | 1.673015  | -3.644436 | 1.514154  |
| C             | 0.833753  | -0.670473 | -3.382363 | C             | -0.413690 | -3.783836 | 0.269478  |
| C             | 0.805453  | -2.025334 | -3.371416 | C             | 1.557501  | -4.976515 | 1.837012  |
| C             | 0.570577  | -1.526800 | 0.128229  | H             | 2.521202  | -3.093444 | 1.896132  |
| H             | 3.424839  | -0.111008 | -1.061534 | C             | -0.538938 | -5.121972 | 0.586879  |
| H             | 2.689313  | -1.701736 | -1.664265 | H             | -1.180276 | -3.312837 | -0.339849 |
| H             | 1.634602  | 0.334627  | 0.234345  | C             | 0.454120  | -5.735925 | 1.378777  |
| H             | 0.171037  | -0.126671 | -4.022665 | H             | 2.303076  | -5.470009 | 2.452230  |
| C             | 2.701605  | -1.227813 | 1.493148  | H             | -1.393790 | -5.683649 | 0.230236  |
| H             | 2.404547  | -1.084287 | 2.511017  | O             | 0.442129  | -7.020291 | 1.753022  |
| H             | 2.844660  | -2.271770 | 1.307169  | C             | -0.641711 | -7.868525 | 1.338374  |
| H             | 3.617048  | -0.704459 | 1.311584  | H             | -0.685036 | -7.938570 | 0.246848  |
| C             | 1.887151  | 1.624304  | -2.519344 | H             | -0.420176 | -8.848597 | 1.761780  |
| H             | 2.116394  | 1.941572  | -3.515180 | H             | -1.594960 | -7.502766 | 1.733031  |
| H             | 0.942973  | 2.031734  | -2.223662 | H             | -0.185001 | -1.318892 | -0.236515 |
| H             | 2.648934  | 1.968101  | -1.851220 | H             | 1.690910  | 1.146545  | -2.386163 |
| H             | 0.120394  | -2.551263 | -4.003074 | C             | -0.208274 | 0.430378  | -4.046596 |
| H             | 1.468169  | -2.569136 | -2.731114 | H             | 0.422675  | 1.058644  | -4.687563 |
| C             | 0.532727  | -2.862362 | 0.551031  | H             | -0.920243 | -0.101170 | -4.683970 |
| C             | -0.502398 | -3.704057 | 0.122096  | H             | -0.771557 | 1.107013  | -3.391549 |
| C             | 1.530002  | -3.356229 | 1.402771  |               |           |           |           |
| C             | -0.538999 | -4.995591 | 0.530958  | <b>TS6b-6</b> |           |           |           |
| H             | -1.263840 | -3.326979 | -0.528226 | C             | 1.644330  | -0.560298 | 0.061244  |
| C             | 1.493401  | -4.647762 | 1.811634  | C             | 2.633649  | -0.554024 | -1.182816 |
| H             | 2.320342  | -2.713575 | 1.730275  | C             | 1.947420  | 0.037261  | -2.362753 |
| C             | 0.458276  | -5.489458 | 1.382696  | C             | 0.833027  | -0.545413 | -2.955245 |
| H             | -1.329341 | -5.638244 | 0.203457  | C             | 0.485294  | -1.851842 | -2.604472 |
| H             | 2.254843  | -5.024841 | 2.461955  | C             | 0.563820  | -1.603579 | -0.012137 |
| H             | -0.190863 | -1.149722 | -0.522095 | H             | 3.503415  | 0.048759  | -0.909015 |

|               |           |           |           |               |           |           |           |
|---------------|-----------|-----------|-----------|---------------|-----------|-----------|-----------|
| O             | 0.423131  | -6.729624 | 1.775298  | H             | 2.982273  | -1.578438 | -1.359304 |
| C             | -0.633120 | -7.588497 | 1.337608  | H             | 1.128527  | 0.404546  | 0.040383  |
| H             | -0.966456 | -7.278860 | 0.369149  | C             | 2.450245  | -0.605071 | 1.380273  |
| H             | -0.275808 | -8.595785 | 1.286634  | H             | 1.783615  | -0.652553 | 2.247393  |
| H             | -1.447435 | -7.533498 | 2.029536  | H             | 3.134639  | -1.455867 | 1.426438  |
| <b>TS2b-2</b> |           |           |           | H             | 3.044701  | 0.311121  | 1.460906  |
| C             | 1.632250  | -0.222504 | -0.203041 | H             | -0.471965 | -2.273779 | -2.901763 |
| C             | 3.068394  | -0.256687 | -0.757949 | H             | 1.226629  | -2.556549 | -2.254250 |
| C             | 3.069408  | 0.252552  | -2.211316 | C             | 0.636938  | -2.976709 | 0.303890  |
| C             | 2.889523  | -0.648363 | -3.269576 | C             | 1.852990  | -3.716040 | 0.461830  |
| C             | 2.714681  | -1.967708 | -3.013986 | C             | -0.589262 | -3.695030 | 0.457297  |
| C             | 0.727837  | -1.124248 | -1.063562 | C             | 1.832914  | -5.055444 | 0.761198  |
| H             | 3.696784  | 0.369850  | -0.160054 | H             | 2.808373  | -3.224593 | 0.326921  |
| H             | 3.437139  | -1.260794 | -0.731589 | C             | -0.619743 | -5.036716 | 0.770819  |
| H             | 2.890227  | -0.294542 | -4.279383 | H             | -1.526024 | -3.159326 | 0.330273  |
| C             | 3.268096  | 1.751807  | -2.501759 | C             | 0.599092  | -5.735270 | 0.926651  |
| H             | 4.311718  | 1.957346  | -2.617977 | H             | 2.751778  | -5.621076 | 0.877112  |
| H             | 2.750897  | 2.012411  | -3.401476 | H             | -1.569238 | -5.543493 | 0.892767  |
| H             | 2.879724  | 2.327353  | -1.687626 | O             | 0.695603  | -7.032200 | 1.221259  |
| H             | 2.577339  | -2.655578 | -3.821992 | C             | -0.498449 | -7.815953 | 1.401132  |
| H             | 2.713976  | -2.321530 | -2.004180 | H             | -1.093631 | -7.829555 | 0.482872  |
| C             | 0.556549  | -2.611598 | -0.702938 | H             | -0.149507 | -8.822941 | 1.630505  |
| C             | 1.427072  | -3.568167 | -1.242462 | H             | -1.092061 | -7.429340 | 2.235221  |
| C             | -0.469847 | -3.008518 | 0.164753  | H             | -0.448346 | -1.216159 | -0.098290 |
| C             | 1.271202  | -4.921656 | -0.914292 | H             | 2.209332  | 1.056761  | -2.638385 |
| H             | 2.210749  | -3.265111 | -1.904962 | C             | -0.059481 | 0.252911  | -3.882100 |
| C             | -0.625719 | -4.362006 | 0.492922  | H             | 0.337259  | 1.258880  | -4.047879 |
| H             | -1.134512 | -2.278156 | 0.576691  | H             | -0.164062 | -0.240339 | -4.855078 |
| C             | 0.244807  | -5.318575 | -0.046599 | H             | -1.067069 | 0.352513  | -3.459701 |
| H             | 1.935868  | -5.652017 | -1.326228 |               |           |           |           |
| H             | -1.409393 | -4.665062 | 1.155425  | <b>TS6c-6</b> |           |           |           |
| O             | 0.085757  | -6.699685 | 0.288270  | C             | 0.515990  | 0.172365  | 0.596106  |
| C             | 0.531360  | -7.509159 | -0.803100 | C             | 1.424129  | -0.121925 | -1.891923 |
| H             | 1.563446  | -7.306336 | -0.999471 | C             | 2.828570  | -0.025727 | -1.676057 |
| H             | 0.412350  | -8.542577 | -0.552534 | C             | 3.441875  | 1.130886  | -1.085274 |
| H             | -0.048293 | -7.284255 | -1.673916 | C             | 2.805137  | 2.279535  | -0.740905 |
| H             | 0.218459  | -0.717365 | -1.912020 | C             | 0.449008  | -0.851452 | -0.390782 |
| C             | 1.631236  | -0.731742 | 1.250326  | H             | 1.118657  | -0.895901 | -2.591546 |
| H             | 0.622371  | -0.867204 | 1.580085  | H             | 0.871433  | 0.805251  | -2.011144 |
| H             | 2.151597  | -1.665286 | 1.301515  | H             | -0.020954 | 1.087004  | 0.354765  |
| H             | 2.119037  | -0.016558 | 1.879183  | H             | 4.512018  | 1.060574  | -0.898943 |
| H             | 1.263505  | 0.781603  | -0.229401 | C             | 1.248009  | 0.135163  | 1.882377  |
| <b>TS2c-2</b> |           |           |           | H             | 1.131813  | -0.831307 | 2.387973  |
| C             | 0.602076  | 0.609251  | 0.482190  | H             | 2.329114  | 0.268963  | 1.717737  |
| C             | 1.172148  | 0.517130  | -1.992915 | H             | 0.916282  | 0.940806  | 2.542557  |

|             |           |           |           |                 |           |           |           |
|-------------|-----------|-----------|-----------|-----------------|-----------|-----------|-----------|
| C           | 2.379892  | -0.193696 | -1.994784 | C               | 3.713361  | -1.169942 | -2.060839 |
| C           | 3.475767  | 0.284915  | -1.264092 | H               | 4.202970  | -0.933510 | -3.019019 |
| C           | 3.367586  | 1.435141  | -0.555682 | H               | 4.516797  | -1.329104 | -1.333174 |
| C           | 0.085800  | -0.376463 | -0.369720 | H               | 3.153536  | -2.097482 | -2.200021 |
| H           | 0.335423  | 0.151700  | -2.550815 | H               | 3.353548  | 3.091743  | -0.272465 |
| H           | 1.086733  | 1.425290  | -1.433585 | H               | 1.749505  | 2.455014  | -0.925348 |
| H           | 4.204311  | 1.800571  | 0.002219  | C               | 0.832211  | -2.267795 | -0.150134 |
| H           | 2.445447  | 1.977872  | -0.554253 | C               | -0.020334 | -3.272917 | -0.633774 |
| C           | 4.802957  | -0.496213 | -1.266145 | C               | 1.996908  | -2.669925 | 0.535242  |
| H           | 4.802797  | -1.201771 | -0.461728 | C               | 0.243813  | -4.626198 | -0.427501 |
| H           | 4.909936  | -1.015177 | -2.195732 | H               | -0.920463 | -2.992699 | -1.176305 |
| H           | 5.618279  | 0.185578  | -1.142402 | C               | 2.276085  | -4.012143 | 0.744486  |
| H           | 2.465306  | -1.101857 | -2.554111 | H               | 2.703861  | -1.931335 | 0.897060  |
| C           | 1.447017  | 0.204967  | 1.704577  | C               | 1.399059  | -5.004687 | 0.271455  |
| H           | 2.155732  | 0.977267  | 1.919462  | H               | -0.446975 | -5.368498 | -0.809551 |
| H           | 0.806450  | 0.063445  | 2.549885  | H               | 3.174384  | -4.317949 | 1.272282  |
| H           | 1.965939  | -0.706709 | 1.493704  | O               | 1.759870  | -6.284388 | 0.533502  |
| H           | 0.409194  | 1.642763  | 0.283322  | C               | 0.915343  | -7.342428 | 0.074682  |
| C           | 0.363401  | -1.863948 | -0.083495 | H               | 0.837182  | -7.343790 | -1.018955 |
| C           | -0.152876 | -2.849661 | -0.935404 | H               | 1.394976  | -8.265770 | 0.404344  |
| C           | 1.132291  | -2.231846 | 1.028881  | H               | -0.085700 | -7.274580 | 0.516431  |
| C           | 0.099737  | -4.203273 | -0.674937 | H               | -0.472191 | -0.773741 | -0.970365 |
| H           | -0.739941 | -2.568763 | -1.784728 |                 |           |           |           |
| C           | 1.384906  | -3.585458 | 1.289348  | <b>Int 2a-7</b> |           |           |           |
| H           | 1.526479  | -1.479232 | 1.679333  | C               | -2.244909 | -2.340025 | -0.290620 |
| C           | 0.868627  | -4.571172 | 0.437440  | C               | -3.496208 | 1.265247  | -0.450762 |
| H           | -0.294450 | -4.955888 | -1.325389 | C               | -2.358286 | 1.904303  | -0.756622 |
| H           | 1.971970  | -3.866357 | 2.138671  | C               | -1.455579 | 2.594004  | 0.190870  |
| O           | 1.126393  | -5.952409 | 0.703224  | C               | -1.333724 | 2.225190  | 1.477385  |
| C           | 2.329933  | -6.348829 | 0.040470  | C               | -1.258172 | -1.942823 | 0.581078  |
| H           | 3.146340  | -5.758015 | 0.400081  | H               | -4.096016 | 0.788415  | -1.221927 |
| H           | 2.522808  | -7.382342 | 0.239344  | H               | -3.880021 | 1.217129  | 0.566059  |
| H           | 2.221204  | -6.202753 | -1.013920 | H               | -2.063397 | -2.313679 | -1.362954 |
| H           | -0.501268 | -0.095564 | -1.219041 | H               | -1.479618 | -1.987847 | 1.646052  |
| <b>P0-2</b> |           |           |           | C               | 0.037799  | -1.466134 | 0.229554  |
| C           | -1.600695 | -0.892435 | 0.666511  | C               | 0.924249  | -1.076172 | 1.284339  |
| C           | -1.735382 | 1.335208  | -0.589299 | C               | 0.506995  | -1.346799 | -1.119821 |
| C           | -3.219983 | 1.092750  | -0.676344 | C               | 2.186294  | -0.597091 | 1.033396  |
| C           | -3.825233 | -0.046411 | -0.309271 | H               | 0.580144  | -1.167971 | 2.310124  |
| C           | -3.044337 | -1.221993 | 0.240845  | C               | 1.761233  | -0.872398 | -1.384152 |
| C           | -0.962405 | 0.009914  | -0.463999 | H               | -0.133523 | -1.632761 | -1.946178 |
| H           | -1.520744 | 2.000268  | 0.258565  | C               | 2.621053  | -0.481910 | -0.313962 |
| H           | -1.393147 | 1.872646  | -1.483555 | H               | 2.835931  | -0.311565 | 1.851687  |
| H           | -1.033711 | -1.830454 | 0.698561  | H               | 2.130623  | -0.774446 | -2.399491 |
| C           | -1.537966 | -0.254632 | 2.061024  | O               | 3.803956  | -0.022480 | -0.682715 |

|           |           |           |           |                |           |           |           |
|-----------|-----------|-----------|-----------|----------------|-----------|-----------|-----------|
| H         | -0.510861 | -0.009159 | 2.353594  | C              | 4.753865  | 0.445802  | 0.302688  |
| H         | -2.137741 | 0.659650  | 2.124362  | H              | 5.619435  | 0.772213  | -0.272379 |
| H         | -1.931966 | -0.958099 | 2.803666  | H              | 4.332658  | 1.285396  | 0.862151  |
| H         | -3.577747 | -1.638146 | 1.108022  | H              | 5.033759  | -0.368772 | 0.975476  |
| H         | -3.040478 | -2.026063 | -0.510832 | C              | -3.578770 | -2.825640 | 0.136395  |
| C         | 0.518408  | 0.134794  | -0.293147 | H              | -3.740073 | -3.848791 | -0.234577 |
| C         | 1.347685  | -0.934308 | -0.766239 | H              | -3.704805 | -2.813704 | 1.222289  |
| C         | 1.149017  | 1.244961  | 0.339019  | H              | -4.367916 | -2.216395 | -0.327333 |
| C         | 2.710711  | -0.918101 | -0.626588 | H              | -0.678965 | 2.761571  | 2.159968  |
| H         | 0.871338  | -1.778851 | -1.254850 | H              | -1.882250 | 1.381860  | 1.888968  |
| C         | 2.510500  | 1.286779  | 0.491892  | H              | -2.063234 | 1.963425  | -1.805508 |
| H         | 0.551160  | 2.071628  | 0.703781  | C              | -0.654353 | 3.737500  | -0.386754 |
| C         | 3.317527  | 0.204125  | 0.011187  | H              | -1.312619 | 4.520112  | -0.787037 |
| H         | 3.315335  | -1.736870 | -0.997218 | H              | 0.000768  | 4.191325  | 0.363222  |
| H         | 3.009257  | 2.123607  | 0.969115  | H              | -0.031449 | 3.396015  | -1.224962 |
| O         | 4.609462  | 0.343632  | 0.205000  |                |           |           |           |
| C         | 5.553360  | -0.668467 | -0.235988 | <b>Int3b-7</b> |           |           |           |
| H         | 5.494859  | -0.781199 | -1.321041 | C              | -2.256351 | -1.512112 | -0.398776 |
| H         | 6.528955  | -0.284836 | 0.057439  | C              | -3.200787 | -0.258624 | -0.100755 |
| H         | 5.344301  | -1.613619 | 0.270736  | C              | -2.672231 | 1.043441  | -0.580902 |
| H         | -1.119592 | -0.559895 | -1.390672 | C              | -2.127567 | 2.070897  | 0.211077  |
| H         | -3.819631 | 1.912223  | -1.071560 | C              | -2.041014 | 1.994823  | 1.588041  |
| C         | -5.312415 | -0.245834 | -0.440489 | C              | -1.081292 | -1.453723 | 0.489662  |
| H         | -5.776393 | -0.424890 | 0.539612  | H              | -4.125698 | -0.495685 | -0.641544 |
| H         | -5.801049 | 0.622188  | -0.895720 | H              | -3.439810 | -0.251695 | 0.966356  |
| H         | -5.540604 | -1.127280 | -1.056686 | H              | -1.964969 | -1.449375 | -1.450463 |
| <b>P2</b> |           |           |           | H              | -1.258569 | -1.761277 | 1.521033  |
| C         | -1.600695 | -0.892435 | 0.666511  | C              | 0.200209  | -1.021097 | 0.184830  |
| C         | -1.735382 | 1.335208  | -0.589299 | C              | 1.190159  | -1.001902 | 1.225302  |
| C         | -3.219983 | 1.092750  | -0.676344 | C              | 0.592727  | -0.566457 | -1.122076 |
| C         | -3.825233 | -0.046411 | -0.309271 | C              | 2.470502  | -0.565541 | 0.997990  |
| C         | -3.044337 | -1.221993 | 0.240845  | H              | 0.905409  | -1.342404 | 2.216823  |
| C         | -0.962405 | 0.009914  | -0.463999 | C              | 1.865662  | -0.124136 | -1.354729 |
| H         | -1.520744 | 2.000268  | 0.258565  | H              | -0.123102 | -0.578831 | -1.935604 |
| H         | -1.393147 | 1.872646  | -1.483555 | C              | 2.823370  | -0.119006 | -0.302676 |
| H         | -1.033711 | -1.830454 | 0.698561  | H              | 3.198349  | -0.559739 | 1.800353  |
| C         | -1.537966 | -0.254632 | 2.061024  | H              | 2.178922  | 0.219950  | -2.334608 |
| H         | -0.510861 | -0.009159 | 2.353594  | O              | 4.026486  | 0.318097  | -0.638308 |
| H         | -2.137741 | 0.659650  | 2.124362  | C              | 5.091469  | 0.347145  | 0.337006  |
| H         | -1.931966 | -0.958099 | 2.803666  | H              | 5.958016  | 0.730402  | -0.200845 |
| H         | -3.577747 | -1.638146 | 1.108022  | H              | 4.835228  | 1.017863  | 1.161702  |
| H         | -3.040478 | -2.026063 | -0.510832 | H              | 5.295791  | -0.660919 | 0.708258  |
| C         | 0.518408  | 0.134794  | -0.293147 | C              | -3.052493 | -2.809622 | -0.162958 |
| C         | 1.347685  | -0.934308 | -0.766239 | H              | -2.438955 | -3.692310 | -0.371215 |
| C         | 1.149017  | 1.244961  | 0.339019  | H              | -3.407760 | -2.874092 | 0.871859  |

|                 |           |           |           |                |           |           |           |
|-----------------|-----------|-----------|-----------|----------------|-----------|-----------|-----------|
| C               | 2.710711  | -0.918101 | -0.626588 | H              | -3.923235 | -2.834133 | -0.826695 |
| H               | 0.871338  | -1.778851 | -1.254850 | H              | -1.602976 | 2.804673  | 2.164155  |
| C               | 2.510500  | 1.286779  | 0.491892  | H              | -2.413589 | 1.145505  | 2.151267  |
| H               | 0.551160  | 2.071628  | 0.703781  | H              | -2.688902 | 1.198246  | -1.658932 |
| C               | 3.317527  | 0.204125  | 0.011187  | C              | -1.602641 | 3.304204  | -0.502806 |
| H               | 3.315335  | -1.736870 | -0.997218 | H              | -2.350416 | 3.710448  | -1.193970 |
| H               | 3.009257  | 2.123607  | 0.969115  | H              | -1.333022 | 4.093254  | 0.205390  |
| O               | 4.609462  | 0.343632  | 0.205000  | H              | -0.710939 | 3.065610  | -1.096231 |
| C               | 5.553360  | -0.668467 | -0.235988 |                |           |           |           |
| H               | 5.494859  | -0.781199 | -1.321041 | <b>Int4c-7</b> |           |           |           |
| H               | 6.528955  | -0.284836 | 0.057439  | C              | -1.011397 | 2.079102  | -0.381470 |
| H               | 5.344301  | -1.613619 | 0.270736  | C              | -2.685915 | -1.119250 | 1.025768  |
| H               | -1.119592 | -0.559895 | -1.390672 | C              | -3.733588 | -1.328468 | 0.210420  |
| H               | -3.819631 | 1.912223  | -1.071560 | C              | -4.927642 | -0.454345 | 0.210640  |
| C               | -5.312415 | -0.245834 | -0.440489 | C              | -5.428535 | 0.199869  | 1.267510  |
| H               | -5.776393 | -0.424890 | 0.539612  | C              | -0.212879 | 1.089429  | -0.907193 |
| H               | -5.801049 | 0.622188  | -0.895720 | H              | -1.827788 | -1.787316 | 1.028478  |
| H               | -5.540604 | -1.127280 | -1.056686 | H              | -2.655780 | -0.282312 | 1.719002  |
| <b>Int 2a-3</b> |           |           |           | H              | -0.658815 | 2.667080  | 0.463198  |
| C               | -1.901869 | 1.963055  | -0.782319 | H              | -5.451299 | -0.378509 | -0.743747 |
| C               | -3.680964 | -0.530282 | -0.735824 | H              | -0.602958 | 0.524956  | -1.752202 |
| C               | -3.176776 | -1.172951 | 0.343144  | C              | 1.091138  | 0.730720  | -0.459140 |
| C               | -2.120784 | -2.195922 | 0.255794  | C              | 1.777655  | -0.319396 | -1.147876 |
| C               | -1.386539 | -2.510177 | -0.824896 | C              | 1.761194  | 1.360707  | 0.641123  |
| C               | -0.801662 | 1.291620  | -1.282903 | C              | 3.039047  | -0.722676 | -0.785459 |
| H               | -4.475249 | 0.202849  | -0.627957 | H              | 1.280165  | -0.805787 | -1.981400 |
| H               | -3.373831 | -0.767980 | -1.750087 | C              | 3.016864  | 0.968979  | 1.013249  |
| H               | -1.919652 | -2.729617 | 1.184443  | H              | 1.273285  | 2.158092  | 1.190122  |
| C               | -3.684068 | -0.876674 | 1.732303  | C              | 3.680535  | -0.077823 | 0.306150  |
| H               | -4.108240 | -1.781063 | 2.189426  | H              | 3.533697  | -1.521187 | -1.324599 |
| H               | -2.866883 | -0.552636 | 2.391140  | H              | 3.536256  | 1.436544  | 1.843124  |
| H               | -4.455276 | -0.101255 | 1.727867  | O              | 4.891698  | -0.374702 | 0.743743  |
| H               | -0.629916 | -3.288597 | -0.776682 | C              | 5.674331  | -1.410069 | 0.104139  |
| H               | -1.517673 | -2.020686 | -1.786623 | H              | 6.611944  | -1.436780 | 0.657867  |
| C               | -2.137845 | 2.530504  | 0.578034  | H              | 5.162195  | -2.372699 | 0.181920  |
| H               | -1.943321 | 1.807686  | 1.377839  | H              | 5.859312  | -1.151660 | -0.941851 |
| H               | -1.475002 | 3.390736  | 0.754354  | C              | -2.355372 | 2.419931  | -0.902627 |
| H               | -3.167970 | 2.882285  | 0.671663  | H              | -2.377879 | 3.475877  | -1.210999 |
| H               | -2.684661 | 2.149643  | -1.513309 | H              | -2.651429 | 1.792051  | -1.746871 |
| C               | 0.431322  | 0.922913  | -0.666710 | H              | -3.106421 | 2.329668  | -0.104247 |
| C               | 0.832597  | 1.264107  | 0.664169  | C              | -3.757588 | -2.467659 | -0.782069 |
| C               | 1.352541  | 0.161293  | -1.455580 | H              | -4.604174 | -3.140024 | -0.589685 |
| C               | 2.045919  | 0.861217  | 1.158800  | H              | -3.883382 | -2.092729 | -1.807097 |
| H               | 0.185841  | 1.858698  | 1.294044  | H              | -2.836130 | -3.056845 | -0.743630 |
| C               | 2.572437  | -0.249263 | -0.971103 | H              | -6.311876 | 0.826545  | 1.174035  |

|                 |           |           |           |             |           |           |           |
|-----------------|-----------|-----------|-----------|-------------|-----------|-----------|-----------|
| H               | 1.071091  | -0.098312 | -2.471895 | H           | -4.989589 | 0.118355  | 2.259651  |
| C               | 2.934728  | 0.095582  | 0.353893  |             |           |           |           |
| H               | 2.358348  | 1.118646  | 2.165561  | <b>P0-7</b> |           |           |           |
| H               | 3.241690  | -0.825836 | -1.597627 | C           | -1.717835 | 1.453894  | 0.100967  |
| H               | -0.888678 | 0.987097  | -2.323863 | C           | -1.785753 | -1.119287 | 0.461117  |
| O               | 4.079653  | -0.241540 | 0.934662  | C           | -3.249464 | -1.102567 | 0.104809  |
| C               | 5.064586  | -1.008164 | 0.209531  | C           | -3.885321 | 0.079598  | 0.221281  |
| H               | 5.886357  | -1.151717 | 0.910406  | C           | -3.137908 | 1.278719  | 0.731680  |
| H               | 4.652668  | -1.976653 | -0.087729 | C           | -1.082122 | 0.074062  | -0.293713 |
| H               | 5.411409  | -0.452129 | -0.666271 | H           | -1.313619 | -2.065466 | 0.178685  |
| <b>Int 3b-3</b> |           |           |           | H           | -1.636566 | -0.986006 | 1.540679  |
| C               | -2.030086 | -0.986735 | 1.081642  | H           | -1.085862 | 1.924058  | 0.862539  |
| C               | -3.290806 | -0.019481 | 0.853748  | H           | -4.940143 | 0.172704  | -0.029804 |
| C               | -3.374499 | 0.580152  | -0.510258 | H           | -1.273008 | -0.090409 | -1.359216 |
| C               | -2.582015 | 1.681921  | -0.871645 | C           | 0.394759  | 0.025007  | -0.082499 |
| C               | -1.789789 | 2.417174  | -0.018591 | C           | 1.269249  | -0.240270 | -1.177040 |
| C               | -0.781657 | -0.213587 | 1.280244  | C           | 0.967125  | 0.211050  | 1.211011  |
| H               | -4.168600 | -0.643890 | 1.043618  | C           | 2.633781  | -0.294274 | -1.020424 |
| H               | -3.255695 | 0.747258  | 1.634560  | H           | 0.837195  | -0.394860 | -2.160909 |
| H               | -2.588173 | 1.965747  | -1.923567 | C           | 2.323240  | 0.159740  | 1.394910  |
| C               | -4.291769 | -0.053511 | -1.511265 | H           | 0.317394  | 0.397815  | 2.059860  |
| H               | -5.340714 | 0.067112  | -1.199763 | C           | 3.182029  | -0.093885 | 0.278580  |
| H               | -4.182097 | 0.389986  | -2.505931 | H           | 3.278994  | -0.486810 | -1.868867 |
| H               | -4.124047 | -1.135835 | -1.590525 | H           | 2.778465  | 0.302456  | 2.369402  |
| H               | -1.154955 | 3.210354  | -0.402972 | O           | 4.469187  | -0.127536 | 0.559720  |
| H               | -1.811881 | 2.296613  | 1.058685  | C           | 5.455263  | -0.382838 | -0.471992 |
| C               | -2.042474 | -2.188475 | 0.134828  | H           | 6.415807  | -0.312737 | 0.035885  |
| H               | -1.941495 | -1.903954 | -0.916120 | H           | 5.313116  | -1.386146 | -0.880912 |
| H               | -1.243750 | -2.894233 | 0.384168  | H           | 5.382841  | 0.374302  | -1.256696 |
| H               | -2.994876 | -2.717680 | 0.243855  | C           | -1.755322 | 2.382242  | -1.119930 |
| H               | -2.236271 | -1.360645 | 2.098691  | H           | -0.763822 | 2.490829  | -1.575635 |
| C               | 0.484700  | -0.259884 | 0.689536  | H           | -2.437977 | 1.995592  | -1.886978 |
| C               | 0.862853  | -1.058703 | -0.442537 | H           | -2.101513 | 3.382311  | -0.833565 |
| C               | 1.502472  | 0.567169  | 1.273435  | C           | -3.887719 | -2.359765 | -0.410625 |
| C               | 2.143644  | -1.027531 | -0.929681 | H           | -3.811083 | -3.172168 | 0.325491  |
| H               | 0.136900  | -1.691095 | -0.932378 | H           | -4.946246 | -2.206976 | -0.645319 |
| C               | 2.790222  | 0.598548  | 0.794337  | H           | -3.382833 | -2.716119 | -1.319819 |
| H               | 1.238809  | 1.188222  | 2.125068  | H           | -3.716950 | 2.195151  | 0.578318  |
| C               | 3.127679  | -0.205712 | -0.321020 | H           | -3.011705 | 1.174223  | 1.820309  |
| H               | 2.433875  | -1.625761 | -1.787277 |             |           |           |           |
| H               | 3.530033  | 1.233896  | 1.265977  | <b>P7</b>   |           |           |           |
| H               | -0.851832 | 0.469671  | 2.125251  | C           | -1.717835 | 1.453894  | 0.100967  |
| O               | 4.335818  | -0.258710 | -0.872774 | C           | -1.785753 | -1.119287 | 0.461117  |
| C               | 5.407691  | 0.546897  | -0.343815 | C           | -3.249464 | -1.102567 | 0.104809  |
| H               | 6.268846  | 0.326338  | -0.974424 | C           | -3.885321 | 0.079598  | 0.221281  |



|                |           |           |           |               |           |           |           |
|----------------|-----------|-----------|-----------|---------------|-----------|-----------|-----------|
| H              | 5.159095  | 1.609988  | -0.410455 | C             | -3.137908 | 1.278719  | 0.731680  |
| H              | 5.623295  | 0.268134  | 0.691981  | C             | -1.082122 | 0.074062  | -0.293713 |
| <b>Int4c-3</b> |           |           |           | H             | -1.313619 | -2.065466 | 0.178685  |
| C              | 1.031905  | 1.614642  | 0.819739  | H             | -1.636566 | -0.986006 | 1.540679  |
| C              | 2.874424  | -0.857731 | -1.321400 | H             | -1.085862 | 1.924058  | 0.862539  |
| C              | 3.773411  | -1.249662 | -0.407354 | H             | -4.940143 | 0.172704  | -0.029804 |
| C              | 5.097812  | -0.636905 | -0.163397 | H             | -1.273008 | -0.090409 | -1.359216 |
| C              | 5.338697  | 0.669213  | -0.364102 | C             | 0.394759  | 0.025007  | -0.082499 |
| C              | 0.140795  | 0.577120  | 1.026329  | C             | 1.269249  | -0.240270 | -1.177040 |
| H              | 1.922919  | -1.371791 | -1.431033 | C             | 0.967125  | 0.211050  | 1.211011  |
| H              | 3.065837  | -0.032025 | -2.003311 | C             | 2.633781  | -0.294274 | -1.020424 |
| H              | 0.518399  | -0.232692 | 1.646561  | H             | 0.837195  | -0.394860 | -2.160909 |
| C              | -1.194623 | 0.390879  | 0.569230  | C             | 2.323240  | 0.159740  | 1.394910  |
| C              | -1.882269 | -0.780116 | 1.034446  | H             | 0.317394  | 0.397815  | 2.059860  |
| C              | -1.901202 | 1.262936  | -0.323477 | C             | 3.182029  | -0.093885 | 0.278580  |
| C              | -3.172581 | -1.066500 | 0.667454  | H             | 3.278994  | -0.486810 | -1.868867 |
| H              | -1.356909 | -1.453523 | 1.705003  | H             | 2.778465  | 0.302456  | 2.369402  |
| C              | -3.186594 | 0.986527  | -0.702087 | O             | 4.469187  | -0.127536 | 0.559720  |
| H              | -1.421257 | 2.147222  | -0.718001 | C             | 5.455263  | -0.382838 | -0.471992 |
| C              | -3.847319 | -0.179307 | -0.212853 | H             | 6.415807  | -0.312737 | 0.035885  |
| H              | -3.664870 | -1.955656 | 1.041918  | H             | 5.313116  | -1.386146 | -0.880912 |
| H              | -3.729265 | 1.637077  | -1.379764 | H             | 5.382841  | 0.374302  | -1.256696 |
| O              | -5.085166 | -0.348485 | -0.641336 | C             | -1.755322 | 2.382242  | -1.119930 |
| C              | -5.861424 | -1.494500 | -0.219498 | H             | -0.763822 | 2.490829  | -1.575635 |
| H              | -6.824288 | -1.380414 | -0.715635 | H             | -2.437977 | 1.995592  | -1.886978 |
| H              | -5.376082 | -2.418835 | -0.543265 | H             | -2.101513 | 3.382311  | -0.833565 |
| H              | -5.991676 | -1.483152 | 0.865784  | C             | -3.887719 | -2.359765 | -0.410625 |
| H              | 6.325402  | 1.095016  | -0.198350 | H             | -3.811083 | -3.172168 | 0.325491  |
| H              | 4.561906  | 1.353816  | -0.695908 | H             | -4.946246 | -2.206976 | -0.645319 |
| C              | 0.851528  | 2.895226  | 0.080103  | H             | -3.382833 | -2.716119 | -1.319819 |
| H              | 0.752639  | 2.715760  | -1.000751 | H             | -3.716950 | 2.195151  | 0.578318  |
| H              | -0.053024 | 3.427465  | 0.399126  | H             | -3.011705 | 1.174223  | 1.820309  |
| H              | 1.712104  | 3.550097  | 0.232599  |               |           |           |           |
| H              | 2.005085  | 1.467972  | 1.283035  | <b>TS7a-7</b> |           |           |           |
| C              | 6.166280  | -1.575523 | 0.348129  | C             | 1.445309  | -0.539969 | 0.931513  |
| H              | 5.855030  | -2.047189 | 1.290200  | C             | 2.222875  | -0.755456 | -1.100915 |
| H              | 6.350135  | -2.391646 | -0.363373 | C             | 1.435713  | -0.075164 | -2.021625 |
| H              | 7.112166  | -1.054009 | 0.523240  | C             | 0.381609  | -0.623765 | -2.836086 |
| H              | 3.544036  | -2.123397 | 0.205036  | C             | 0.031176  | -1.940450 | -2.785322 |
|                |           |           |           | C             | 0.253322  | -1.267740 | 0.853285  |
| <b>TS3a-3</b>  |           |           |           | H             | 3.123570  | -0.261036 | -0.752660 |
| C              | 1.547969  | -0.243765 | 0.271149  | H             | 2.250358  | -1.840121 | -1.083085 |
| C              | 2.777603  | -0.925762 | -1.405968 | H             | 1.393064  | 0.544000  | 0.875526  |
| C              | 2.442687  | -0.222581 | -2.563121 | H             | 0.318289  | -2.333666 | 1.070922  |
| C              | 1.428250  | -0.674584 | -3.490698 | C             | -1.035997 | -0.784410 | 0.503617  |

|               |           |           |           |               |           |           |           |
|---------------|-----------|-----------|-----------|---------------|-----------|-----------|-----------|
| C             | 0.713124  | -1.819735 | -3.402931 | C             | -2.120643 | -1.704919 | 0.456219  |
| C             | 0.304645  | -0.833905 | -0.011448 | C             | -1.317110 | 0.583557  | 0.212773  |
| H             | 3.675763  | -0.630213 | -0.872074 | C             | -3.404920 | -1.307097 | 0.140673  |
| H             | 2.498022  | -1.967924 | -1.297372 | H             | -1.926027 | -2.750859 | 0.677626  |
| H             | 1.230180  | -0.010611 | -4.330751 | C             | -2.590815 | 0.989445  | -0.110070 |
| C             | 3.111032  | 1.086409  | -2.874464 | H             | -0.524710 | 1.322996  | 0.259470  |
| H             | 3.625865  | 1.023057  | -3.843268 | C             | -3.652434 | 0.051609  | -0.150731 |
| H             | 2.373733  | 1.894700  | -2.971431 | H             | -4.205440 | -2.036588 | 0.117268  |
| H             | 3.844196  | 1.367159  | -2.114863 | H             | -2.813816 | 2.029074  | -0.327713 |
| H             | -0.040657 | -2.057521 | -4.147903 | O             | -4.850788 | 0.554254  | -0.468578 |
| H             | 0.859616  | -2.550670 | -2.613446 | C             | -5.997542 | -0.312026 | -0.503406 |
| C             | 1.848545  | 1.224946  | 0.413731  | H             | -6.838348 | 0.332175  | -0.762178 |
| H             | 1.623653  | 1.805396  | -0.483685 | H             | -5.877259 | -1.088077 | -1.266535 |
| H             | 1.257306  | 1.644522  | 1.239282  | H             | -6.169094 | -0.768765 | 0.476649  |
| H             | 2.904249  | 1.372725  | 0.657086  | C             | 2.614272  | -1.098107 | 1.701461  |
| H             | 2.189247  | -0.888719 | 0.867557  | H             | 2.452502  | -0.911171 | 2.772308  |
| C             | -0.931530 | -0.287112 | -0.459504 | H             | 2.715330  | -2.179535 | 1.563895  |
| C             | -1.203233 | 1.096879  | -0.683724 | H             | 3.556093  | -0.614079 | 1.428346  |
| C             | -2.005339 | -1.200739 | -0.675157 | H             | -0.777288 | -2.324987 | -3.400392 |
| C             | -2.445908 | 1.517735  | -1.098278 | H             | 0.537082  | -2.658330 | -2.147439 |
| H             | -0.434702 | 1.840282  | -0.522405 | H             | 1.610102  | 0.994973  | -2.124168 |
| C             | -3.255401 | -0.788902 | -1.091916 | C             | -0.329733 | 0.333130  | -3.765521 |
| H             | -1.829452 | -2.259509 | -0.505292 | H             | 0.378281  | 0.795418  | -4.464627 |
| C             | -3.489856 | 0.585464  | -1.307948 | H             | -1.102758 | -0.174351 | -4.349141 |
| H             | -2.653340 | 2.569807  | -1.266258 | H             | -0.802670 | 1.147674  | -3.203490 |
| H             | -4.041532 | -1.518407 | -1.244500 |               |           |           |           |
| H             | 0.283990  | -1.912944 | 0.130628  | <b>TS7b-7</b> |           |           |           |
| O             | -4.658174 | 1.106009  | -1.702980 | C             | 1.408399  | -0.535643 | 0.192706  |
| C             | -5.776744 | 0.237009  | -1.945986 | C             | 2.499429  | -0.773852 | -0.923819 |
| H             | -6.595676 | 0.894946  | -2.238301 | C             | 2.085613  | -0.154715 | -2.211555 |
| H             | -5.556059 | -0.461892 | -2.759212 | C             | 1.001362  | -0.616008 | -2.948307 |
| H             | -6.050563 | -0.311206 | -1.038628 | C             | 0.397239  | -1.824202 | -2.595108 |
| <b>TS3b-3</b> |           |           |           | C             | 0.151701  | -1.305435 | -0.022220 |
| C             | 1.556971  | -0.294921 | -0.261174 | H             | 3.430118  | -0.325658 | -0.565593 |
| C             | 2.790884  | -0.816929 | -1.126010 | H             | 2.667467  | -1.854738 | -1.011378 |
| C             | 2.852967  | -0.158944 | -2.464318 | H             | 1.202501  | 0.537436  | 0.225889  |
| C             | 1.834798  | -0.394125 | -3.391354 | H             | 0.253947  | -2.386807 | 0.050809  |
| C             | 0.890684  | -1.394797 | -3.253084 | C             | -1.164795 | -0.812735 | 0.027675  |
| C             | 0.264136  | -0.897574 | -0.697244 | C             | -2.243174 | -1.747089 | 0.105716  |
| H             | 3.694665  | -0.603778 | -0.548889 | C             | -1.494631 | 0.580185  | 0.019313  |
| H             | 2.700600  | -1.906251 | -1.210367 | C             | -3.556398 | -1.340094 | 0.181049  |
| H             | 1.746988  | 0.287388  | -4.236741 | H             | -2.011550 | -2.808586 | 0.109456  |
| C             | 3.923365  | 0.851336  | -2.724088 | C             | -2.800973 | 0.994492  | 0.086732  |
| H             | 4.910647  | 0.365991  | -2.714064 | H             | -0.707474 | 1.323081  | -0.046633 |
| H             | 3.796049  | 1.349448  | -3.689913 | C             | -3.850653 | 0.043562  | 0.169817  |

|               |           |           |           |               |           |           |           |
|---------------|-----------|-----------|-----------|---------------|-----------|-----------|-----------|
| H             | 3.953769  | 1.613285  | -1.933204 | H             | -4.349477 | -2.074693 | 0.246825  |
| H             | 0.033044  | -1.440885 | -3.918371 | H             | -3.060950 | 2.048017  | 0.080398  |
| H             | 1.054812  | -2.263798 | -2.627792 | O             | -5.080741 | 0.552969  | 0.231749  |
| C             | 1.639726  | 1.212790  | -0.008019 | C             | -6.218480 | -0.327320 | 0.305431  |
| H             | 1.547063  | 1.802023  | -0.924832 | H             | -7.087514 | 0.329757  | 0.339354  |
| H             | 0.867471  | 1.539500  | 0.695087  | H             | -6.270569 | -0.967303 | -0.580994 |
| H             | 2.611613  | 1.446949  | 0.439200  | H             | -6.177756 | -0.936074 | 1.214063  |
| H             | 1.726762  | -0.801316 | 0.704089  | C             | 1.991127  | -0.964644 | 1.562825  |
| C             | -1.025489 | -0.359735 | -0.890473 | H             | 1.280551  | -0.777369 | 2.374041  |
| C             | -1.345550 | 1.027614  | -1.045529 | H             | 2.246911  | -2.030099 | 1.565982  |
| C             | -2.115519 | -1.285769 | -0.934240 | H             | 2.901568  | -0.389982 | 1.764821  |
| C             | -2.645371 | 1.439049  | -1.211069 | H             | -0.549805 | -2.121192 | -3.038903 |
| H             | -0.561361 | 1.771210  | -1.054306 | H             | 0.932192  | -2.595634 | -2.054664 |
| C             | -3.423411 | -0.879542 | -1.086996 | H             | 2.542184  | 0.792438  | -2.490506 |
| H             | -1.901005 | -2.345917 | -0.830352 | C             | 0.402707  | 0.225893  | -4.055431 |
| C             | -3.704385 | 0.497732  | -1.226070 | H             | 0.981044  | 1.140386  | -4.216402 |
| H             | -2.889811 | 2.489213  | -1.334478 | H             | 0.365457  | -0.327695 | -5.000561 |
| H             | -4.219543 | -1.614200 | -1.101986 | H             | -0.626656 | 0.514990  | -3.808976 |
| H             | 0.279919  | -1.983337 | -0.623556 | <b>TS7c-7</b> |           |           |           |
| O             | -4.927844 | 1.009002  | -1.383396 | C             | 0.573418  | 0.286945  | 0.886422  |
| C             | -6.069423 | 0.133173  | -1.395212 | C             | 1.029327  | -0.097579 | -1.705431 |
| H             | -6.930212 | 0.784346  | -1.547911 | C             | 2.383044  | -0.531245 | -1.605456 |
| H             | -5.999816 | -0.586994 | -2.216507 | C             | 3.449945  | 0.344275  | -1.215104 |
| H             | -6.165402 | -0.390632 | -0.438854 | C             | 3.331834  | 1.673549  | -0.963572 |
|               |           |           |           | C             | -0.001244 | -0.490808 | -0.152680 |
| <b>TS3c-3</b> |           |           |           | H             | 0.411227  | -0.707427 | -2.360217 |
| C             | 0.510412  | 0.386536  | 0.716822  | H             | 0.842290  | 0.966430  | -1.814214 |
| C             | 1.005494  | 0.354150  | -1.783608 | H             | 0.168373  | 1.274477  | 1.095961  |
| C             | 2.318649  | -0.218337 | -1.798626 | H             | 4.431714  | -0.114342 | -1.112575 |
| C             | 3.500103  | 0.337770  | -1.234779 | H             | 0.240064  | -1.552874 | -0.087622 |
| C             | 3.498278  | 1.565983  | -0.626525 | C             | -1.406529 | -0.234076 | -0.585715 |
| C             | -0.030457 | -0.313564 | -0.398262 | C             | -2.218661 | -1.323316 | -0.927416 |
| H             | 0.358763  | -0.023902 | -2.572459 | C             | -1.954035 | 1.059136  | -0.682943 |
| H             | 0.928076  | 1.433194  | -1.677172 | C             | -3.541538 | -1.150289 | -1.334705 |
| H             | 0.318424  | -1.345944 | -0.442811 | H             | -1.816041 | -2.331494 | -0.865697 |
| C             | -1.465298 | -0.180067 | -0.796389 | C             | -3.265904 | 1.247815  | -1.090315 |
| C             | -2.253567 | -1.334804 | -0.880534 | H             | -1.350375 | 1.930676  | -0.444499 |
| C             | -2.061160 | 1.055270  | -1.111708 | C             | -4.073890 | 0.143925  | -1.419935 |
| C             | -3.602648 | -1.274415 | -1.232611 | H             | -4.141191 | -2.018950 | -1.579409 |
| H             | -1.812120 | -2.303377 | -0.657516 | H             | -3.689072 | 2.244843  | -1.166561 |
| C             | -3.399211 | 1.130847  | -1.470907 | O             | -5.340357 | 0.434324  | -1.807758 |
| H             | -1.470731 | 1.967212  | -1.088168 | C             | -6.200666 | -0.640505 | -2.191265 |
| C             | -4.185389 | -0.033732 | -1.526840 | H             | -7.146333 | -0.175087 | -2.474570 |
| H             | -4.182933 | -2.188652 | -1.276909 | H             | -5.794077 | -1.188955 | -3.049289 |
| H             | -3.859200 | 2.083743  | -1.714522 | H             | -6.371599 | -1.332466 | -1.358025 |

|             |           |           |           |                |           |           |           |
|-------------|-----------|-----------|-----------|----------------|-----------|-----------|-----------|
| O           | -5.482675 | 0.145909  | -1.880333 | C              | 1.693622  | -0.191713 | 1.722303  |
| C           | -6.336838 | -0.997631 | -1.941600 | H              | 1.274519  | -0.586372 | 2.664905  |
| H           | -7.316884 | -0.618950 | -2.237378 | H              | 2.246521  | -1.011460 | 1.251571  |
| H           | -5.986219 | -1.719145 | -2.689153 | H              | 2.376475  | 0.616926  | 2.002065  |
| H           | -6.416614 | -1.489283 | -0.964651 | C              | 2.710640  | -1.967541 | -1.877311 |
| H           | 4.398979  | 1.959528  | -0.164245 | H              | 3.184095  | -2.054458 | -2.867341 |
| H           | 2.620348  | 2.203389  | -0.591700 | H              | 3.432799  | -2.362423 | -1.153256 |
| C           | -0.088836 | 1.500193  | 1.473242  | H              | 1.818192  | -2.599719 | -1.882704 |
| H           | 0.423980  | 2.443728  | 1.220822  | H              | 4.196278  | 2.252514  | -0.651584 |
| H           | -1.158463 | 1.626968  | 1.302303  | H              | 2.398125  | 2.217871  | -1.069764 |
| H           | 0.109247  | 1.347708  | 2.543260  |                |           |           |           |
| H           | 1.511341  | 0.086881  | 1.021632  | <b>Int2a-8</b> |           |           |           |
| C           | 4.764920  | -0.490686 | -1.304799 | C              | 1.308689  | 2.353754  | 0.339594  |
| H           | 4.637910  | -1.446233 | -0.781927 | C              | 2.810621  | -0.638255 | 2.035128  |
| H           | 5.019563  | -0.724203 | -2.345513 | C              | 3.614093  | -1.024444 | 1.034411  |
| H           | 5.612266  | 0.035126  | -0.856578 | C              | 3.200713  | -1.756487 | -0.183528 |
| H           | 2.403232  | -1.216295 | -2.226094 | C              | 2.195742  | -2.647324 | -0.181056 |
| <b>P0-3</b> |           |           |           | C              | 0.540456  | 1.788778  | -0.651076 |
| C           | 1.600089  | -0.891693 | 0.667097  | H              | 3.204236  | -0.119684 | 2.905857  |
| C           | 1.735575  | 1.334825  | -0.591341 | H              | 1.739955  | -0.831142 | 2.022242  |
| C           | 3.220212  | 1.091907  | -0.677562 | H              | 1.895287  | -3.165451 | -1.088749 |
| C           | 3.825054  | -0.046975 | -0.308737 | H              | 1.656275  | -2.902180 | 0.727901  |
| C           | 3.043898  | -1.221932 | 0.242404  | C              | 2.590407  | 3.056790  | 0.094104  |
| C           | 0.962680  | 0.009452  | -0.464625 | H              | 2.860477  | 3.084085  | -0.964913 |
| H           | 1.393770  | 1.870760  | -1.486609 | H              | 2.534618  | 4.084926  | 0.481032  |
| H           | 1.520524  | 2.001236  | 0.255293  | H              | 3.396282  | 2.568122  | 0.660526  |
| H           | 1.119874  | -0.561294 | -1.390662 | H              | 0.978031  | 2.302380  | 1.374566  |
| C           | -0.518145 | 0.134657  | -0.293878 | C              | -0.699877 | 1.110930  | -0.473309 |
| C           | -1.347625 | -0.934404 | -0.766815 | C              | -1.327052 | 0.925071  | 0.801978  |
| C           | -1.148526 | 1.244697  | 0.338679  | C              | -1.361341 | 0.585379  | -1.629533 |
| C           | -2.710610 | -0.918115 | -0.626997 | C              | -2.525612 | 0.268729  | 0.921400  |
| H           | -0.871398 | -1.779067 | -1.255338 | H              | -0.851093 | 1.308804  | 1.697362  |
| C           | -2.509974 | 1.286653  | 0.491675  | C              | -2.558394 | -0.068073 | -1.526150 |
| H           | -0.550570 | 2.071273  | 0.703539  | H              | -0.894554 | 0.716831  | -2.600903 |
| C           | -3.317228 | 0.204026  | 0.011138  | C              | -3.163166 | -0.236528 | -0.246417 |
| H           | -3.315361 | -1.736810 | -0.997552 | H              | -2.979643 | 0.140183  | 1.896470  |
| H           | -3.008646 | 2.123438  | 0.969079  | H              | -3.070396 | -0.468755 | -2.394546 |
| O           | -4.609044 | 0.343551  | 0.205501  | H              | 0.903295  | 1.861561  | -1.674920 |
| C           | -5.553247 | -0.668417 | -0.235093 | O              | -4.319323 | -0.875527 | -0.249475 |
| H           | -6.528668 | -0.284455 | 0.058432  | C              | -5.033952 | -1.120738 | 0.984307  |
| H           | -5.494859 | -0.781625 | -1.320098 | H              | -5.285519 | -0.174383 | 1.470055  |
| H           | -5.344368 | -1.613478 | 0.271874  | H              | -5.941475 | -1.643635 | 0.684734  |
| H           | 3.040601  | -2.026892 | -0.508285 | H              | -4.435924 | -1.752260 | 1.646649  |
| H           | 3.577018  | -1.636829 | 1.110347  | H              | 4.672333  | -0.762783 | 1.086430  |
| H           | 3.820280  | 1.910773  | -1.073391 | C              | 3.996919  | -1.453949 | -1.431968 |

|           |           |           |           |                |           |           |           |
|-----------|-----------|-----------|-----------|----------------|-----------|-----------|-----------|
| C         | 5.312240  | -0.246641 | -0.439003 | H              | 3.930226  | -0.390265 | -1.697926 |
| H         | 5.540898  | -1.128289 | -1.054737 | H              | 5.062859  | -1.669990 | -1.277647 |
| H         | 5.801259  | 0.621252  | -0.894068 | H              | 3.649836  | -2.043954 | -2.285728 |
| H         | 5.775591  | -0.425368 | 0.541485  |                |           |           |           |
| H         | 1.032776  | -1.829456 | 0.699979  | <b>Int3b-8</b> |           |           |           |
| C         | 1.536791  | -0.252161 | 2.060785  | C              | -1.463064 | 1.647847  | -0.017852 |
| H         | 0.509544  | -0.006115 | 2.352341  | C              | -2.558309 | 1.111381  | -1.042878 |
| H         | 1.930218  | -0.954755 | 2.804554  | C              | -3.664718 | 0.304951  | -0.457359 |
| H         | 2.136767  | 0.662025  | 2.123444  | C              | -3.714320 | -1.098735 | -0.376363 |
| <b>P3</b> |           |           |           | C              | -2.702758 | -1.911648 | -0.851961 |
| C         | 1.600269  | -0.892294 | 0.666337  | C              | -0.688371 | 0.521858  | 0.539983  |
| C         | 3.043698  | -1.222520 | 0.240295  | H              | -2.974599 | 2.022809  | -1.488596 |
| C         | 3.825059  | -0.046698 | -0.308940 | H              | -2.033703 | 0.571575  | -1.836935 |
| C         | 3.220225  | 1.092735  | -0.676092 | H              | -2.759029 | -2.991316 | -0.746913 |
| C         | 1.735575  | 1.335550  | -0.589709 | H              | -1.830724 | -1.519212 | -1.365183 |
| C         | 0.962566  | 0.010068  | -0.464278 | C              | -2.118345 | 2.460732  | 1.119856  |
| H         | 3.576962  | -1.639345 | 1.107216  | H              | -2.757881 | 1.832236  | 1.747913  |
| H         | 3.039624  | -2.025988 | -0.512005 | H              | -1.357044 | 2.919774  | 1.758863  |
| H         | 1.520579  | 2.001100  | 0.257642  | H              | -2.732196 | 3.259760  | 0.689415  |
| H         | 1.393895  | 1.872540  | -1.484404 | H              | -0.818059 | 2.312057  | -0.599055 |
| C         | 1.537936  | -0.254186 | 2.060729  | C              | 0.656352  | 0.225184  | 0.367822  |
| H         | 2.138167  | 0.659775  | 2.124080  | C              | 1.546706  | 1.011848  | -0.437238 |
| H         | 0.510884  | -0.008259 | 2.353083  | C              | 1.201983  | -0.923567 | 1.042030  |
| H         | 1.931586  | -0.957765 | 2.803453  | C              | 2.874505  | 0.688573  | -0.556829 |
| H         | 1.032792  | -1.829990 | 0.698651  | H              | 1.168648  | 1.881204  | -0.963564 |
| C         | -0.518277 | 0.135084  | -0.293421 | C              | 2.525245  | -1.248375 | 0.933509  |
| C         | -1.148930 | 1.245165  | 0.338791  | H              | 0.538720  | -1.532457 | 1.649488  |
| C         | -1.347540 | -0.934173 | -0.766289 | C              | 3.383847  | -0.442262 | 0.137044  |
| C         | -2.510417 | 1.286984  | 0.491501  | H              | 3.527872  | 1.296947  | -1.169624 |
| H         | -0.551220 | 2.071933  | 0.703627  | H              | 2.949073  | -2.107808 | 1.442004  |
| C         | -2.710529 | -0.918113 | -0.626569 | H              | -1.248148 | -0.159047 | 1.180845  |
| H         | -0.871126 | -1.778762 | -1.254757 | O              | 4.650059  | -0.823937 | 0.102594  |
| C         | -3.317450 | 0.204145  | 0.011089  | C              | 5.621694  | -0.070277 | -0.656383 |
| H         | -3.009245 | 2.123832  | 0.968631  | H              | 5.695488  | 0.950967  | -0.272444 |
| H         | -3.315114 | -1.736995 | -0.996996 | H              | 6.565028  | -0.595013 | -0.508395 |
| H         | 1.119589  | -0.559712 | -1.390933 | H              | 5.357394  | -0.066054 | -1.717308 |
| O         | -4.609366 | 0.343736  | 0.204709  | H              | -4.496655 | 0.858936  | -0.027197 |
| C         | -5.553226 | -0.668953 | -0.235048 | C              | -4.936280 | -1.725993 | 0.271548  |
| H         | -6.528658 | -0.285755 | 0.059457  | H              | -5.105953 | -1.323179 | 1.277164  |
| H         | -5.495820 | -0.781951 | -1.320141 | H              | -5.840149 | -1.517663 | -0.314172 |
| H         | -5.343076 | -1.613892 | 0.271602  | H              | -4.833552 | -2.812125 | 0.353346  |
| H         | 3.820396  | 1.912120  | -1.070689 |                |           |           |           |
| C         | 5.312211  | -0.246340 | -0.439450 | <b>Int4c-8</b> |           |           |           |
| H         | 5.540771  | -1.127145 | -1.056399 | C              | 1.347839  | 2.361042  | 0.350982  |
| H         | 5.801391  | 0.622112  | -0.893283 | C              | 3.573696  | -0.522231 | -1.281577 |

|                |           |           |           |           |           |           |           |
|----------------|-----------|-----------|-----------|-----------|-----------|-----------|-----------|
| H              | 5.775534  | -0.426462 | 0.540800  | C         | 3.062690  | -1.516113 | -0.535561 |
| <b>int2a-4</b> |           |           |           | C         | 3.735311  | -2.024212 | 0.680554  |
| C              | -1.281188 | 2.323935  | -0.174531 | C         | 4.491250  | -1.308673 | 1.523096  |
| C              | -2.837233 | -0.785745 | -1.557602 | C         | 0.425174  | 1.843053  | -0.527802 |
| C              | -3.549803 | -1.159531 | -0.480692 | H         | 3.060896  | -0.158981 | -2.169039 |
| C              | -2.929635 | -1.795428 | 0.702639  | H         | 4.530322  | -0.062318 | -1.046739 |
| C              | -1.845239 | -2.581972 | 0.701132  | H         | 3.559031  | -3.077439 | 0.905336  |
| C              | -0.534132 | 1.619126  | 0.740086  | C         | 1.774238  | -2.211749 | -0.907830 |
| H              | -3.316385 | -0.341658 | -2.427011 | H         | 1.947276  | -3.282699 | -1.081222 |
| H              | -1.759592 | -0.919149 | -1.606927 | H         | 1.035703  | -2.143293 | -0.097650 |
| H              | -3.442929 | -1.618297 | 1.649229  | H         | 1.331980  | -1.788124 | -1.815011 |
| C              | -5.040851 | -0.932151 | -0.393360 | H         | 4.959414  | -1.769137 | 2.389519  |
| H              | -5.578271 | -1.880638 | -0.260298 | H         | 4.665556  | -0.243848 | 1.382419  |
| H              | -5.291281 | -0.307401 | 0.474952  | H         | 1.193630  | 2.248680  | 1.422116  |
| H              | -5.428979 | -0.441765 | -1.291338 | C         | 2.570562  | 3.087178  | -0.065283 |
| H              | -1.454876 | -3.004170 | 1.623824  | H         | 2.677242  | 3.146078  | -1.151687 |
| H              | -1.321755 | -2.844493 | -0.215828 | H         | 2.557245  | 4.105587  | 0.351546  |
| C              | -2.578691 | 2.968641  | 0.138455  | H         | 3.460759  | 2.604739  | 0.363008  |
| H              | -2.886397 | 2.814337  | 1.176174  | C         | -0.773520 | 1.156620  | -0.179238 |
| H              | -2.518628 | 4.048192  | -0.064823 | C         | -1.613486 | 0.678239  | -1.235155 |
| H              | -3.359450 | 2.582563  | -0.532565 | C         | -1.193453 | 0.923764  | 1.172019  |
| H              | -0.917664 | 2.439875  | -1.193388 | C         | -2.789603 | 0.016477  | -0.983054 |
| C              | 0.724009  | 0.994775  | 0.500809  | H         | -1.302668 | 0.849013  | -2.261760 |
| C              | 1.390698  | 1.013996  | -0.767337 | C         | -2.362588 | 0.267731  | 1.437669  |
| C              | 1.365232  | 0.315168  | 1.585660  | H         | -0.584309 | 1.276206  | 1.996666  |
| C              | 2.610480  | 0.411385  | -0.943738 | C         | -3.183221 | -0.195726 | 0.365938  |
| H              | 0.927935  | 1.513662  | -1.611089 | H         | -3.406089 | -0.337825 | -1.800242 |
| C              | 2.580105  | -0.292501 | 1.423735  | H         | -2.695979 | 0.087465  | 2.454260  |
| H              | 0.869508  | 0.292430  | 2.551268  | H         | 0.616091  | 1.966033  | -1.592326 |
| C              | 3.227778  | -0.250130 | 0.154735  | O         | -4.293355 | -0.810934 | 0.731816  |
| H              | 3.095745  | 0.441766  | -1.911467 | C         | -5.216394 | -1.319804 | -0.259144 |
| H              | 3.075831  | -0.807996 | 2.239299  | H         | -6.027812 | -1.765647 | 0.314493  |
| H              | -0.929439 | 1.523726  | 1.749611  | H         | -5.594736 | -0.501280 | -0.876773 |
| O              | 4.401348  | -0.855155 | 0.099673  | H         | -4.727684 | -2.079321 | -0.875134 |
| C              | 5.178891  | -0.856843 | -1.120398 | <b>P0</b> |           |           |           |
| H              | 5.417195  | 0.168190  | -1.416117 | C         | 1.735895  | 1.364476  | 0.349898  |
| H              | 6.090485  | -1.399408 | -0.873167 | C         | 1.847471  | -1.164088 | 0.044501  |
| H              | 4.635628  | -1.374875 | -1.915284 | C         | 3.352350  | -1.031278 | -0.046707 |
|                |           |           |           | C         | 3.947495  | 0.168323  | -0.094722 |
| <b>Int3b-4</b> |           |           |           | C         | 3.211755  | 1.480962  | -0.063620 |
| C              | 1.686646  | -1.254287 | 0.060233  | C         | 1.105975  | 0.137706  | -0.383440 |
| C              | 2.691028  | -0.626885 | -1.014669 | H         | 1.561665  | -1.434846 | 1.070501  |
| C              | 3.650928  | 0.396339  | -0.505517 | H         | 1.510556  | -1.995087 | -0.589235 |
| C              | 3.242328  | 1.718686  | -0.270162 | H         | 5.033486  | 0.219997  | -0.170971 |
| C              | 1.999779  | 2.233137  | -0.569499 | C         | 4.122863  | -2.325875 | -0.074220 |

|                |           |           |           |               |           |           |           |
|----------------|-----------|-----------|-----------|---------------|-----------|-----------|-----------|
| C              | 0.772079  | -0.257174 | 0.662331  | H             | 3.859921  | -2.929111 | -0.954680 |
| H              | 3.237756  | -1.486223 | -1.415763 | H             | 5.203516  | -2.149782 | -0.091858 |
| H              | 2.071895  | -0.223872 | -1.822475 | H             | 3.892210  | -2.943252 | 0.805643  |
| H              | 3.960731  | 2.378873  | 0.214806  | H             | 3.715914  | 2.168408  | 0.630674  |
| C              | 5.058803  | -0.026586 | -0.217230 | H             | 3.280364  | 1.966035  | -1.051069 |
| H              | 5.575906  | -0.298443 | -1.150410 | H             | 1.696740  | 1.157713  | 1.428319  |
| H              | 5.635690  | 0.766317  | 0.268531  | C             | 0.988006  | 2.672698  | 0.069409  |
| H              | 5.090480  | -0.922851 | 0.416150  | H             | 0.942420  | 2.879169  | -1.007641 |
| H              | 1.737190  | 3.246551  | -0.279701 | H             | -0.038058 | 2.650310  | 0.453945  |
| H              | 1.267142  | 1.693570  | -1.159220 | H             | 1.502513  | 3.514789  | 0.547328  |
| C              | 2.451969  | -1.998279 | 1.174403  | C             | -0.365177 | -0.003544 | -0.150072 |
| H              | 3.050421  | -1.311722 | 1.782110  | C             | -1.274298 | 0.016187  | -1.251079 |
| H              | 1.755129  | -2.519861 | 1.839099  | C             | -0.894098 | -0.171216 | 1.165938  |
| H              | 3.119549  | -2.745057 | 0.731461  | C             | -2.629601 | -0.105818 | -1.073518 |
| H              | 1.114449  | -1.986956 | -0.514471 | H             | -0.873747 | 0.133077  | -2.253233 |
| C              | -0.602309 | -0.125338 | 0.454296  | C             | -2.241227 | -0.294069 | 1.371722  |
| C              | -1.343399 | -0.920570 | -0.477224 | H             | -0.217026 | -0.192084 | 2.013348  |
| C              | -1.328474 | 0.853876  | 1.214427  | C             | -3.136189 | -0.257757 | 0.251571  |
| C              | -2.699450 | -0.757146 | -0.641504 | H             | -3.302976 | -0.088058 | -1.921423 |
| H              | -0.835188 | -1.672595 | -1.070724 | H             | -2.665375 | -0.412417 | 2.363328  |
| C              | -2.679420 | 1.016443  | 1.063049  | H             | 1.265884  | 0.279333  | -1.459108 |
| H              | -0.784630 | 1.472806  | 1.922545  | O             | -4.409881 | -0.369546 | 0.551750  |
| C              | -3.386853 | 0.211615  | 0.131654  | C             | -5.439185 | -0.313406 | -0.472074 |
| H              | -3.233977 | -1.373291 | -1.354145 | H             | -6.377508 | -0.409115 | 0.071534  |
| H              | -3.233370 | 1.751011  | 1.638232  | H             | -5.390910 | 0.646467  | -0.991776 |
| H              | 1.209006  | 0.396098  | 1.414661  | H             | -5.312760 | -1.144987 | -1.169139 |
| O              | -4.694312 | 0.438934  | 0.056951  | <b>TS8a-8</b> |           |           |           |
| C              | -5.512206 | -0.326133 | -0.851204 | C             | 1.429909  | -0.599682 | 0.414363  |
| H              | -5.481423 | -1.389163 | -0.594162 | C             | 2.598989  | -0.957643 | -1.402782 |
| H              | -6.523011 | 0.059062  | -0.717984 | C             | 2.046685  | -0.224671 | -2.443825 |
| H              | -5.187957 | -0.171914 | -1.884447 | C             | 1.059538  | -0.672796 | -3.397924 |
|                |           |           |           | C             | 0.581630  | -1.945695 | -3.404505 |
| <b>Int4c-4</b> |           |           |           | C             | 0.332549  | -1.439802 | 0.189951  |
| C              | -1.175615 | 1.895629  | -0.795530 | H             | 3.471528  | -0.547993 | -0.902214 |
| C              | -3.119269 | -0.642910 | 1.510157  | H             | 2.503872  | -2.037648 | -1.365738 |
| C              | -3.345766 | -1.431276 | 0.445354  | H             | -0.179376 | -2.252560 | -4.116475 |
| C              | -4.600041 | -1.386839 | -0.339432 | H             | 0.941956  | -2.709423 | -2.722975 |
| C              | -5.453168 | -0.357396 | -0.432111 | C             | 1.261657  | 0.894868  | 0.459686  |
| C              | -0.272558 | 1.776115  | 0.234811  | H             | 0.506098  | 1.244612  | -0.250140 |
| H              | -2.183663 | -0.694612 | 2.061428  | H             | 0.934326  | 1.182782  | 1.468708  |
| H              | -3.865221 | 0.056167  | 1.880098  | H             | 2.204021  | 1.415251  | 0.265420  |
| H              | -4.817518 | -2.289605 | -0.911961 | H             | 2.256446  | -0.992741 | 1.001521  |
| C              | -2.328100 | -2.447496 | -0.018491 | C             | 0.229884  | -2.830858 | 0.470176  |
| H              | -2.740212 | -3.464396 | 0.035197  | C             | 1.265415  | -3.596475 | 1.076253  |
| H              | -2.048549 | -2.280603 | -1.067539 | C             | -0.983302 | -3.505405 | 0.139528  |

|               |           |           |           |               |           |           |           |
|---------------|-----------|-----------|-----------|---------------|-----------|-----------|-----------|
| H             | -1.418529 | -2.417042 | 0.589239  | C             | 1.108383  | -4.943398 | 1.336271  |
| H             | -6.356493 | -0.431010 | -1.032292 | H             | 2.200843  | -3.121100 | 1.351783  |
| H             | -5.288572 | 0.585471  | 0.085088  | C             | -1.152718 | -4.844703 | 0.399147  |
| C             | -2.462456 | 2.622323  | -0.692419 | H             | -1.786407 | -2.940268 | -0.324948 |
| H             | -2.636933 | 3.034185  | 0.304961  | C             | -0.108154 | -5.583352 | 1.003605  |
| H             | -2.486973 | 3.438457  | -1.430304 | H             | 1.915299  | -5.498434 | 1.799681  |
| H             | -3.294098 | 1.955931  | -0.963755 | H             | -2.076345 | -5.358403 | 0.152707  |
| H             | -0.956282 | 1.444597  | -1.760735 | H             | -0.543652 | -0.985871 | -0.271532 |
| C             | 0.983521  | 1.104761  | 0.181274  | O             | -0.367258 | -6.877163 | 1.222144  |
| C             | 1.793895  | 1.076210  | 1.361824  | C             | 0.627844  | -7.709452 | 1.841358  |
| C             | 1.488827  | 0.458567  | -0.994241 | H             | 0.877840  | -7.338762 | 2.840505  |
| C             | 3.010647  | 0.450685  | 1.374343  | H             | 0.171711  | -8.696749 | 1.918170  |
| H             | 1.424591  | 1.562791  | 2.259363  | H             | 1.528710  | -7.765207 | 1.221874  |
| C             | 2.707200  | -0.171707 | -0.995895 | H             | 2.340812  | 0.820791  | -2.521603 |
| H             | 0.904934  | 0.464837  | -1.907849 | C             | 0.562227  | 0.353397  | -4.391028 |
| C             | 3.489512  | -0.184888 | 0.192224  | H             | 0.072389  | 1.191082  | -3.878414 |
| H             | 3.631675  | 0.422518  | 2.263371  | H             | 1.395031  | 0.775377  | -4.967129 |
| H             | 3.069780  | -0.652933 | -1.895774 | H             | -0.152641 | -0.082592 | -5.094211 |
| O             | 4.674278  | -0.760596 | 0.298004  |               |           |           |           |
| C             | 5.268521  | -1.439743 | -0.832980 | <b>TS8b-8</b> |           |           |           |
| H             | 5.434230  | -0.735038 | -1.652189 | C             | 1.763026  | -0.698044 | -0.058760 |
| H             | 6.220993  | -1.819076 | -0.465196 | C             | 2.729296  | -0.391302 | -1.282362 |
| H             | 4.630956  | -2.267674 | -1.154456 | C             | 2.030365  | 0.183614  | -2.461053 |
| H             | -0.529253 | 2.239603  | 1.185950  | C             | 1.103454  | -0.546878 | -3.194351 |
|               |           |           |           | C             | 0.937280  | -1.905580 | -2.906845 |
| <b>TS4a-4</b> |           |           |           | C             | 0.594632  | -1.575680 | -0.383041 |
| C             | 1.308110  | -0.482513 | 0.426096  | H             | 3.493868  | 0.296206  | -0.910963 |
| C             | 2.677711  | -0.825060 | -1.282175 | H             | 3.231409  | -1.332091 | -1.538549 |
| C             | 2.193146  | -0.150574 | -2.397441 | H             | 0.103475  | -2.464627 | -3.324322 |
| C             | 1.254442  | -0.744619 | -3.330542 | H             | 1.728330  | -2.494280 | -2.459494 |
| C             | 0.745833  | -1.994324 | -3.264833 | C             | 1.243693  | 0.615237  | 0.562279  |
| C             | 0.247146  | -1.351033 | 0.141208  | H             | 0.625370  | 1.175172  | -0.148171 |
| H             | 3.500529  | -0.380470 | -0.730337 | H             | 0.640665  | 0.417752  | 1.455059  |
| H             | 2.592487  | -1.903626 | -1.210617 | H             | 2.088559  | 1.247464  | 0.857308  |
| H             | 0.929605  | -0.098756 | -4.144925 | H             | 2.400350  | -1.199946 | 0.673967  |
| C             | 2.590924  | 1.274015  | -2.658216 | C             | 0.389320  | -2.898825 | 0.056100  |
| H             | 3.044289  | 1.360879  | -3.655380 | C             | 1.399558  | -3.691511 | 0.678633  |
| H             | 1.712900  | 1.934468  | -2.663183 | C             | -0.900645 | -3.494812 | -0.127292 |
| H             | 3.306344  | 1.646086  | -1.921182 | C             | 1.149366  | -4.982970 | 1.090933  |
| H             | 0.027353  | -2.337584 | -4.003870 | H             | 2.389861  | -3.277849 | 0.835758  |
| H             | 1.030931  | -2.709317 | -2.499046 | C             | -1.161626 | -4.775181 | 0.287474  |
| C             | 1.090080  | 1.004363  | 0.460261  | H             | -1.682899 | -2.910653 | -0.604161 |
| H             | 0.368130  | 1.332086  | -0.293815 | C             | -0.138049 | -5.540220 | 0.902191  |
| H             | 0.687969  | 1.277834  | 1.446441  | H             | 1.935456  | -5.559005 | 1.563678  |
| H             | 2.023482  | 1.558284  | 0.329189  | H             | -2.139161 | -5.227723 | 0.157035  |



|               |           |           |           |               |           |           |           |
|---------------|-----------|-----------|-----------|---------------|-----------|-----------|-----------|
| H             | 2.109177  | -0.851064 | 1.061973  | H             | -0.287019 | -1.070053 | -0.767522 |
| C             | 0.175016  | -2.748230 | 0.404635  | O             | -0.486822 | -6.773238 | 1.269116  |
| C             | 1.203522  | -3.486299 | 1.054722  | C             | 0.482251  | -7.641736 | 1.885690  |
| C             | -0.992622 | -3.461783 | -0.000006 | H             | 0.838296  | -7.215574 | 2.828386  |
| C             | 1.085932  | -4.844088 | 1.280242  | H             | -0.049595 | -8.573723 | 2.077681  |
| H             | 2.102561  | -2.981738 | 1.392493  | H             | 1.321395  | -7.825192 | 1.207799  |
| C             | -1.121811 | -4.812575 | 0.222611  | H             | 2.147249  | 1.244475  | -2.669749 |
| H             | -1.791913 | -2.918563 | -0.496557 | C             | 0.204293  | 0.124972  | -4.209380 |
| C             | -0.081111 | -5.524472 | 0.864162  | H             | 0.397225  | 1.200425  | -4.263760 |
| H             | 1.886681  | -5.376877 | 1.779247  | H             | 0.350984  | -0.300462 | -5.209025 |
| H             | -2.009456 | -5.355971 | -0.084976 | H             | -0.851930 | -0.018689 | -3.950228 |
| H             | -0.619157 | -0.918447 | -0.357408 | <b>TS8c-8</b> |           |           |           |
| O             | -0.294285 | -6.835201 | 1.033297  | C             | 0.363539  | 0.090141  | 0.631754  |
| C             | 0.708118  | -7.640202 | 1.675365  | C             | 1.316133  | 0.191324  | -1.862346 |
| H             | 0.882065  | -7.300325 | 2.701435  | C             | 2.707974  | -0.058110 | -1.721293 |
| H             | 0.302841  | -8.652361 | 1.686929  | C             | 3.546528  | 0.707500  | -0.842620 |
| H             | 1.643699  | -7.624197 | 1.107044  | C             | 3.151129  | 1.784228  | -0.118860 |
|               |           |           |           | C             | 0.294989  | -0.767376 | -0.496528 |
| <b>TS4b-4</b> |           |           |           | H             | 0.842029  | -0.291037 | -2.713515 |
| C             | 1.709145  | -0.681206 | -0.045393 | H             | 0.956320  | 1.201016  | -1.685416 |
| C             | 2.707016  | -0.415586 | -1.258677 | H             | 4.575255  | 0.366499  | -0.743727 |
| C             | 2.062289  | 0.189473  | -2.459388 | C             | 3.327873  | -1.202342 | -2.459930 |
| C             | 1.128747  | -0.561059 | -3.174517 | H             | 3.861439  | -0.810921 | -3.340745 |
| C             | 0.892420  | -1.902314 | -2.921595 | H             | 4.072868  | -1.724854 | -1.850350 |
| C             | 0.545195  | -1.567460 | -0.355062 | H             | 2.581249  | -1.914557 | -2.819456 |
| H             | 3.494830  | 0.236255  | -0.870638 | H             | 3.843680  | 2.279044  | 0.556055  |
| H             | 3.169272  | -1.377772 | -1.507726 | H             | 2.158843  | 2.217381  | -0.195549 |
| H             | 0.502911  | -0.048010 | -3.903306 | H             | 1.061098  | -0.141656 | 1.433344  |
| C             | 2.338635  | 1.618137  | -2.795725 | C             | -0.482602 | 1.292703  | 0.801694  |
| H             | 3.402333  | 1.750941  | -3.042818 | H             | -1.067020 | 1.531871  | -0.091362 |
| H             | 1.741226  | 1.966084  | -3.643467 | H             | -1.184189 | 1.112517  | 1.632866  |
| H             | 2.146620  | 2.271565  | -1.933388 | H             | 0.112637  | 2.164231  | 1.104020  |
| H             | 0.049052  | -2.411993 | -3.379201 | C             | 0.743422  | -2.181801 | -0.403255 |
| H             | 1.623467  | -2.534601 | -2.432893 | C             | 0.054125  | -3.162096 | -1.130027 |
| C             | 1.192493  | 0.647633  | 0.541678  | C             | 1.822347  | -2.592907 | 0.403984  |
| H             | 0.564672  | 1.187633  | -0.175454 | C             | 0.405034  | -4.510775 | -1.058818 |
| H             | 0.595855  | 0.468284  | 1.442538  | H             | -0.783345 | -2.870512 | -1.759599 |
| H             | 2.035095  | 1.290584  | 0.818877  | C             | 2.184495  | -3.928460 | 0.483894  |
| H             | 2.338769  | -1.166254 | 0.705289  | H             | 2.390237  | -1.862388 | 0.973303  |
| C             | 0.360329  | -2.895428 | 0.080258  | C             | 1.478059  | -4.902483 | -0.246413 |
| C             | 1.379458  | -3.673073 | 0.705938  | H             | -0.158957 | -5.238995 | -1.629657 |
| C             | -0.915166 | -3.516324 | -0.117669 | H             | 3.015106  | -4.245404 | 1.107276  |
| C             | 1.151987  | -4.974444 | 1.104049  | H             | -0.624268 | -0.644921 | -1.070568 |
| H             | 2.359355  | -3.241195 | 0.878470  | O             | 1.911456  | -6.178495 | -0.098683 |
| C             | -1.152890 | -4.806728 | 0.282057  | C             | 1.232727  | -7.218059 | -0.806986 |

|               |           |           |           |           |           |           |           |
|---------------|-----------|-----------|-----------|-----------|-----------|-----------|-----------|
| H             | -1.705149 | -2.945095 | -0.597320 | H         | 1.745724  | -8.142656 | -0.536428 |
| C             | -0.119570 | -5.557604 | 0.896332  | H         | 0.180545  | -7.284053 | -0.506122 |
| H             | 1.946385  | -5.537339 | 1.578881  | H         | 1.297610  | -7.069407 | -1.891467 |
| H             | -2.119678 | -5.277859 | 0.137251  | <b>P8</b> |           |           |           |
| H             | -0.339899 | -1.073826 | -0.747653 | C         | 1.735895  | 1.364476  | 0.349898  |
| O             | -0.445214 | -6.804955 | 1.243792  | C         | 1.847471  | -1.164088 | 0.044501  |
| C             | 0.540335  | -7.659909 | 1.850362  | C         | 3.352350  | -1.031278 | -0.046707 |
| H             | 0.877432  | -7.245812 | 2.805558  | C         | 3.947495  | 0.168323  | -0.094722 |
| H             | 0.032680  | -8.610116 | 2.017608  | C         | 3.211755  | 1.480962  | -0.063620 |
| H             | 1.390939  | -7.807157 | 1.177696  | C         | 1.105975  | 0.137706  | -0.383440 |
| <b>TS4c-4</b> |           |           |           | H         | 1.561665  | -1.434846 | 1.070501  |
| C             | 0.521922  | 0.267524  | 0.804787  | H         | 1.510556  | -1.995087 | -0.589235 |
| C             | 1.115329  | 0.194164  | -1.785245 | H         | 5.033486  | 0.219997  | -0.170971 |
| C             | 2.486374  | -0.180450 | -1.829088 | C         | 4.122863  | -2.325875 | -0.074220 |
| C             | 3.506742  | 0.531805  | -1.113518 | H         | 3.859921  | -2.929111 | -0.954680 |
| C             | 3.318216  | 1.667354  | -0.396011 | H         | 5.203516  | -2.149782 | -0.091858 |
| C             | 0.219769  | -0.615549 | -0.264824 | H         | 3.892210  | -2.943252 | 0.805643  |
| H             | 0.488180  | -0.262380 | -2.546951 | H         | 3.715914  | 2.168408  | 0.630674  |
| H             | 0.877347  | 1.238642  | -1.605263 | H         | 3.280364  | 1.966035  | -1.051069 |
| H             | 4.504406  | 0.097844  | -1.142439 | H         | 1.696740  | 1.157713  | 1.428319  |
| C             | 2.893781  | -1.404620 | -2.585849 | C         | 0.988006  | 2.672698  | 0.069409  |
| H             | 3.455317  | -1.102179 | -3.483475 | H         | 0.942420  | 2.879169  | -1.007641 |
| H             | 3.570521  | -2.035105 | -1.996997 | H         | -0.038058 | 2.650310  | 0.453945  |
| H             | 2.035556  | -1.996374 | -2.911389 | H         | 1.502513  | 3.514789  | 0.547328  |
| H             | 4.142734  | 2.117621  | 0.149331  | C         | -0.365177 | -0.003544 | -0.150072 |
| H             | 2.368915  | 2.192206  | -0.355172 | C         | -1.274298 | 0.016187  | -1.251079 |
| C             | -0.187640 | 1.545794  | 1.035917  | C         | -0.894098 | -0.171216 | 1.165938  |
| H             | -0.864779 | 1.810353  | 0.218811  | C         | -2.629601 | -0.105818 | -1.073518 |
| H             | -0.783447 | 1.452618  | 1.959104  | H         | -0.873747 | 0.133077  | -2.253233 |
| H             | 0.515406  | 2.368168  | 1.221987  | C         | -2.241227 | -0.294069 | 1.371722  |
| H             | 1.307338  | 0.004696  | 1.509245  | H         | -0.217026 | -0.192084 | 2.013348  |
| C             | 0.532366  | -2.067989 | -0.171132 | C         | -3.136189 | -0.257757 | 0.251571  |
| C             | -0.338666 | -2.986446 | -0.786878 | H         | -3.302976 | -0.088058 | -1.921423 |
| C             | 1.639407  | -2.576717 | 0.523956  | H         | -2.665375 | -0.412417 | 2.363328  |
| C             | -0.119097 | -4.353665 | -0.704609 | H         | 1.265884  | 0.279333  | -1.459108 |
| H             | -1.205654 | -2.619951 | -1.331205 | O         | -4.409881 | -0.369546 | 0.551750  |
| C             | 1.874687  | -3.948237 | 0.615471  | C         | -5.439185 | -0.313406 | -0.472074 |
| H             | 2.341524  | -1.903231 | 1.007328  | H         | -6.377508 | -0.409115 | 0.071534  |
| C             | 0.991621  | -4.848934 | -0.000610 | H         | -5.390910 | 0.646467  | -0.991776 |
| H             | -0.797362 | -5.058873 | -1.175148 | H         | -5.312760 | -1.144987 | -1.169139 |
| H             | 2.739644  | -4.301513 | 1.164917  |           |           |           |           |
| O             | 1.121320  | -6.198357 | 0.024854  |           |           |           |           |
| C             | 2.242600  | -6.767785 | 0.703263  |           |           |           |           |
| H             | 2.226485  | -6.528367 | 1.773154  |           |           |           |           |
| H             | 2.149567  | -7.847378 | 0.572906  |           |           |           |           |

|   |           |           |           |
|---|-----------|-----------|-----------|
| H | 3.188250  | -6.429047 | 0.263626  |
| H | -0.757701 | -0.420493 | -0.708417 |

**P0-4**

|   |           |           |           |
|---|-----------|-----------|-----------|
| C | -1.702361 | 1.027694  | -0.367339 |
| C | -3.217451 | 0.987363  | -0.104684 |
| C | -3.834583 | -0.392909 | -0.137863 |
| C | -3.074361 | -1.495996 | -0.117255 |
| C | -1.570205 | -1.494218 | -0.054146 |
| C | -1.018564 | -0.120018 | 0.437349  |
| H | -3.435757 | 1.453473  | 0.869819  |
| H | -3.716772 | 1.626274  | -0.847526 |
| H | -3.549097 | -2.477103 | -0.131514 |
| C | -5.339009 | -0.448635 | -0.174900 |
| H | -5.730580 | 0.036239  | -1.080078 |
| H | -5.709153 | -1.478958 | -0.151836 |
| H | -5.775527 | 0.090176  | 0.678112  |
| H | -1.222714 | -2.285775 | 0.621825  |
| H | -1.144727 | -1.731361 | -1.039934 |
| C | -1.131172 | 2.409036  | -0.027271 |
| H | -1.208863 | 2.615476  | 1.047868  |
| H | -0.076505 | 2.497440  | -0.312489 |
| H | -1.683845 | 3.193974  | -0.557040 |
| H | -1.535335 | 0.829787  | -1.435204 |
| C | 0.474604  | -0.116060 | 0.359644  |
| C | 1.147102  | -0.173180 | -0.903559 |
| C | 1.260244  | -0.084040 | 1.546112  |
| C | 2.515333  | -0.178081 | -0.993094 |
| H | 0.555073  | -0.206991 | -1.812307 |
| C | 2.628599  | -0.090820 | 1.486274  |
| H | 0.758548  | -0.049406 | 2.507868  |
| C | 3.281856  | -0.130224 | 0.210731  |
| H | 3.004355  | -0.218978 | -1.958789 |
| H | 3.246449  | -0.060611 | 2.377440  |
| H | -1.301992 | -0.002508 | 1.490135  |
| O | 4.594375  | -0.114924 | 0.260971  |
| C | 5.403550  | -0.122996 | -0.944772 |
| H | 5.169966  | 0.753619  | -1.553297 |
| H | 6.431947  | -0.080591 | -0.590637 |
| H | 5.228031  | -1.046287 | -1.501540 |

**P4**

|   |           |           |           |
|---|-----------|-----------|-----------|
| H | -3.549097 | -2.477103 | -0.131514 |
| C | -5.339009 | -0.448635 | -0.174900 |
| H | -5.730580 | 0.036239  | -1.080078 |
| H | -5.709153 | -1.478958 | -0.151836 |

|   |           |           |           |
|---|-----------|-----------|-----------|
| H | -5.775527 | 0.090176  | 0.678112  |
| H | -1.222714 | -2.285775 | 0.621825  |
| H | -1.144727 | -1.731361 | -1.039934 |
| C | -1.131172 | 2.409036  | -0.027271 |
| H | -1.208863 | 2.615476  | 1.047868  |
| H | -0.076505 | 2.497440  | -0.312489 |
| H | -1.683845 | 3.193974  | -0.557040 |
| H | -1.535335 | 0.829787  | -1.435204 |
| C | 0.474604  | -0.116060 | 0.359644  |
| C | 1.147102  | -0.173180 | -0.903559 |
| C | 1.260244  | -0.084040 | 1.546112  |
| C | 2.515333  | -0.178081 | -0.993094 |
| H | 0.555073  | -0.206991 | -1.812307 |
| C | 2.628599  | -0.090820 | 1.486274  |
| H | 0.758548  | -0.049406 | 2.507868  |
| C | 3.281856  | -0.130224 | 0.210731  |
| H | 3.004355  | -0.218978 | -1.958789 |
| H | 3.246449  | -0.060611 | 2.377440  |
| H | -1.301992 | -0.002508 | 1.490135  |
| O | 4.594375  | -0.114924 | 0.260971  |
| C | 5.403550  | -0.122996 | -0.944772 |
